# Supplementary material for: Ebselen analogues with dual human neutrophil elastase (HNE) inhibitory and antiradical activity
Source: Royal Society of Chemistry journal article supplement (doi:10.1039/d3md00736g), 2024-01-01
Supplement: d3md00736g1.pdf [file d3md00736g1.pdf]

Supporting Information

for

## **Ebselen analogues with dual human neutrophil elastase (HNE) inhibitory and antiradical activity**

Letizia Crocetti<sup>\*a</sup>, Francesca Catarzi<sup>a</sup>, Maria Paola Giovannoni<sup>a</sup>, Claudia Vergelli<sup>a</sup>, Gianluca Bartolucci<sup>a</sup>, Marco Pallecchi<sup>a</sup>, Paola Paoli<sup>b</sup>, Patrizia Rossi<sup>b</sup>, Martina Lippi<sup>b</sup>, Igor A. Schepetkin<sup>c</sup>, Mark T. Quinn<sup>c</sup>, and Gabriella Guerrini<sup>a</sup>

<sup>a</sup>*NEUROFARBA, Pharmaceutical and Nutraceutical Section, University of Florence, Via Ugo Schiff 6, 50019 Sesto Fiorentino, Italy*

<sup>b</sup>*Department of Industrial Engineering, Via Santa Marta 3 - 50136 Florence University of Florence, Florence, Italy*

<sup>c</sup>*Department of Microbiology and Cell Biology, Montana State University, Bozeman, MT 59717, USA*

### **\*Corresponding Author**

Dr. Letizia Crocetti  
Department of NEUROFARBA  
Via Ugo Schiff 6  
Sesto Fiorentino 50019 Firenze  
Tel +39-055-4573683  
E-mail: [letizia.crocetti@unifi.it](mailto:letizia.crocetti@unifi.it)

### **Table of contents**

1. <sup>1</sup>H NMR, <sup>13</sup>C NMR, <sup>77</sup>Se NMR spectra of some representative final compounds (pages 1-18)
2. Mass Spectrometry spectra (pages 19-36) and purity data (**Table S1**)
3. Crystallographic data and refinement parameters of **4d** (**Table S2, Figure S1**)
4. Volume and surface accessible to solvent for **4d**, **4e**, **4j**, **4g** and **4k** and for the *i*-propyl, *t*-butyl, *c*-propyl, *n*-pentyl and *c*-pentyl residues (**Table S3**)
5. Overlapping of surface accessible to solvent of compounds **4d**, **4e**, **4j**, (**Figure S2, Figure S3**); **4g** and **4k** (**Figure S4, Figure S5**)

1.  $^1\text{H-NMR}$ ,  $^{13}\text{C-NMR}$ ,  $^{77}\text{Se-NMR}$  spectra of some representative final compounds

$^1\text{H NMR}$  Compound 3c  
DMSO

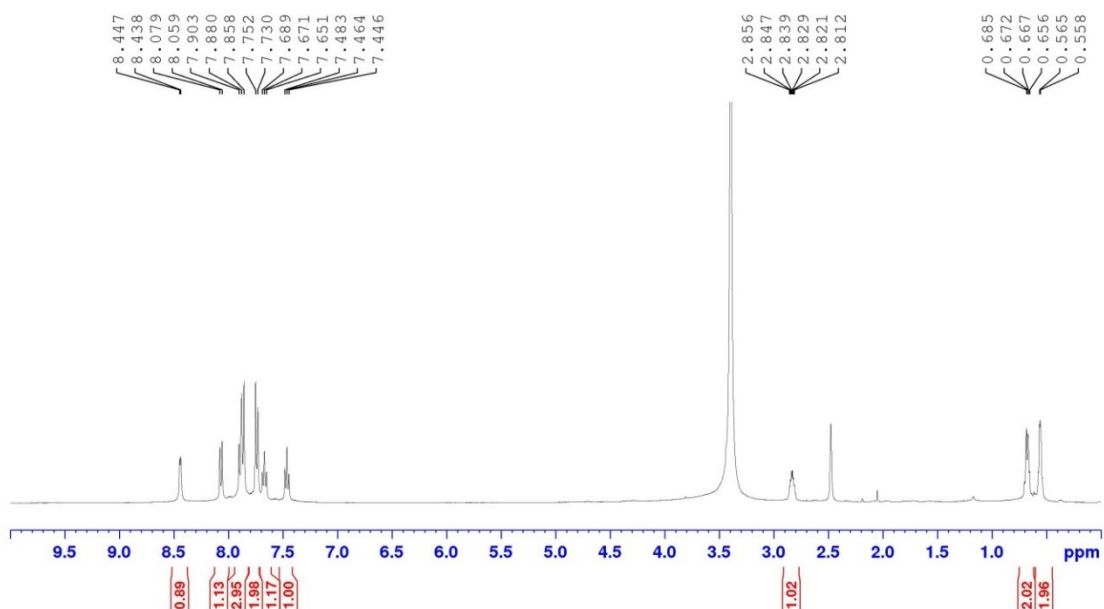

$^1\text{H NMR}$  Compound 3c  
DMSO + D<sub>2</sub>O

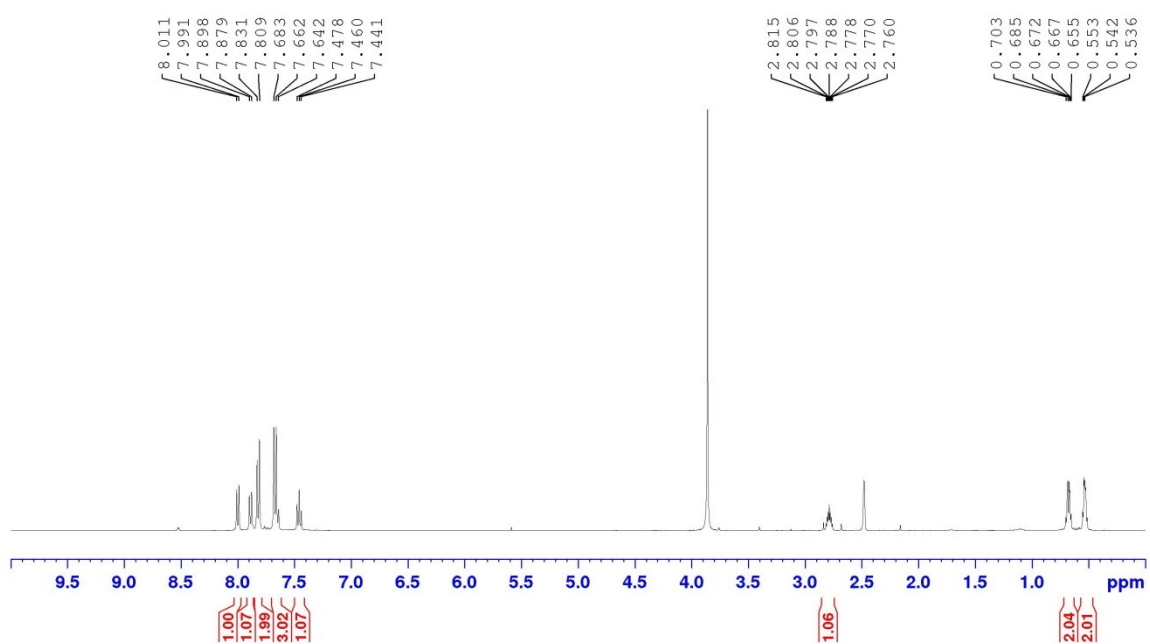

<sup>13</sup>C NMR Compound 3c  
DMSO

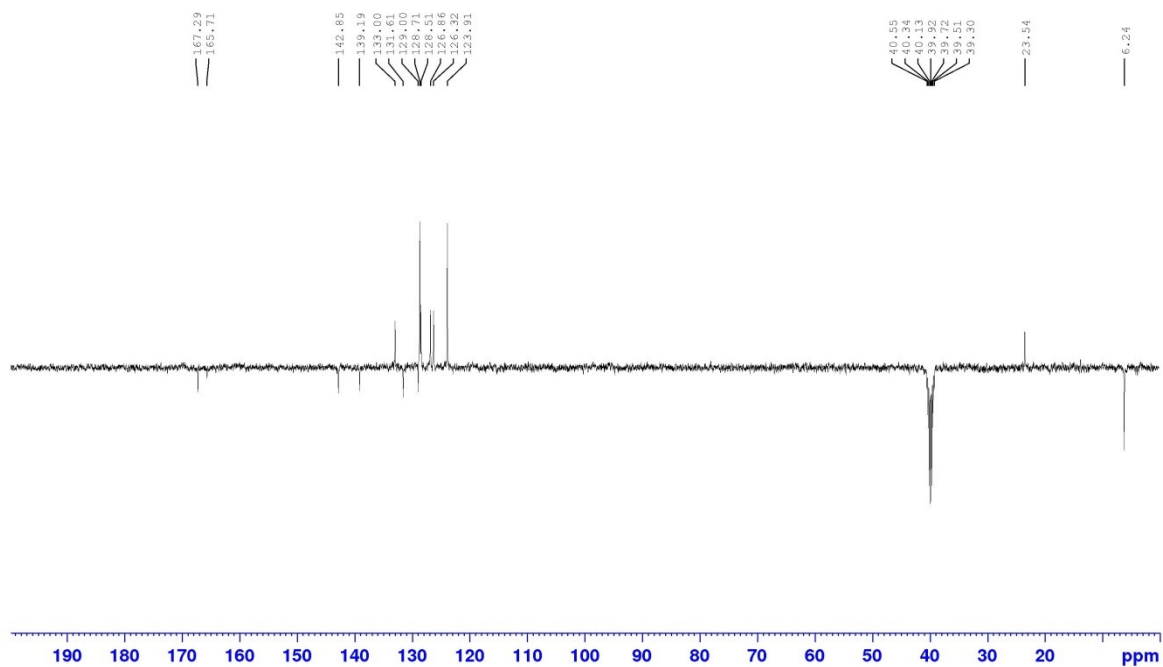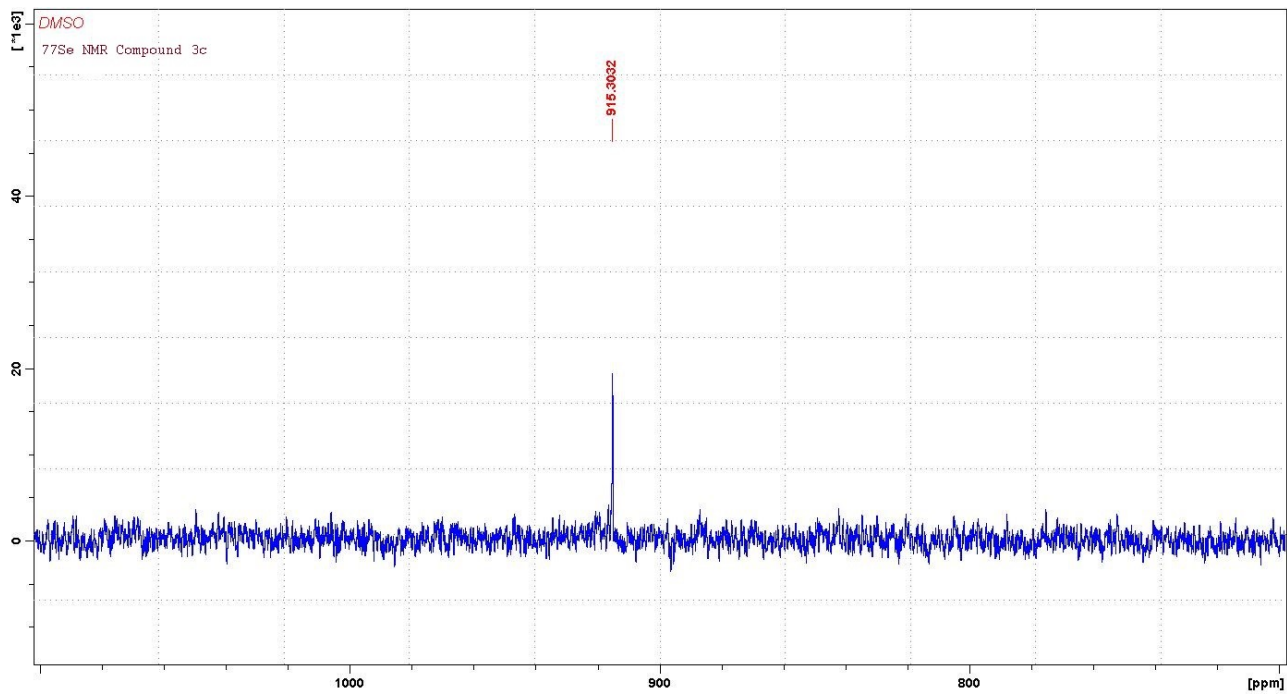

<sup>1</sup>H NMR Compound 4a  
CDCl<sub>3</sub>

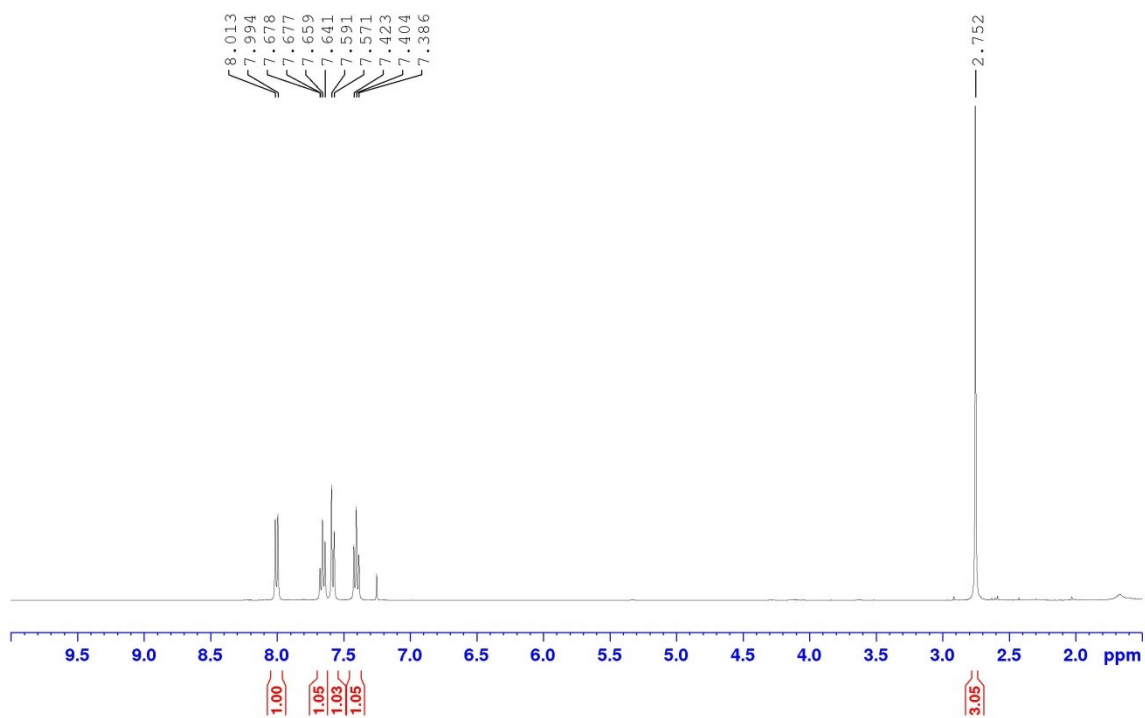

<sup>13</sup>C NMR Compound 4a  
CDCl<sub>3</sub>

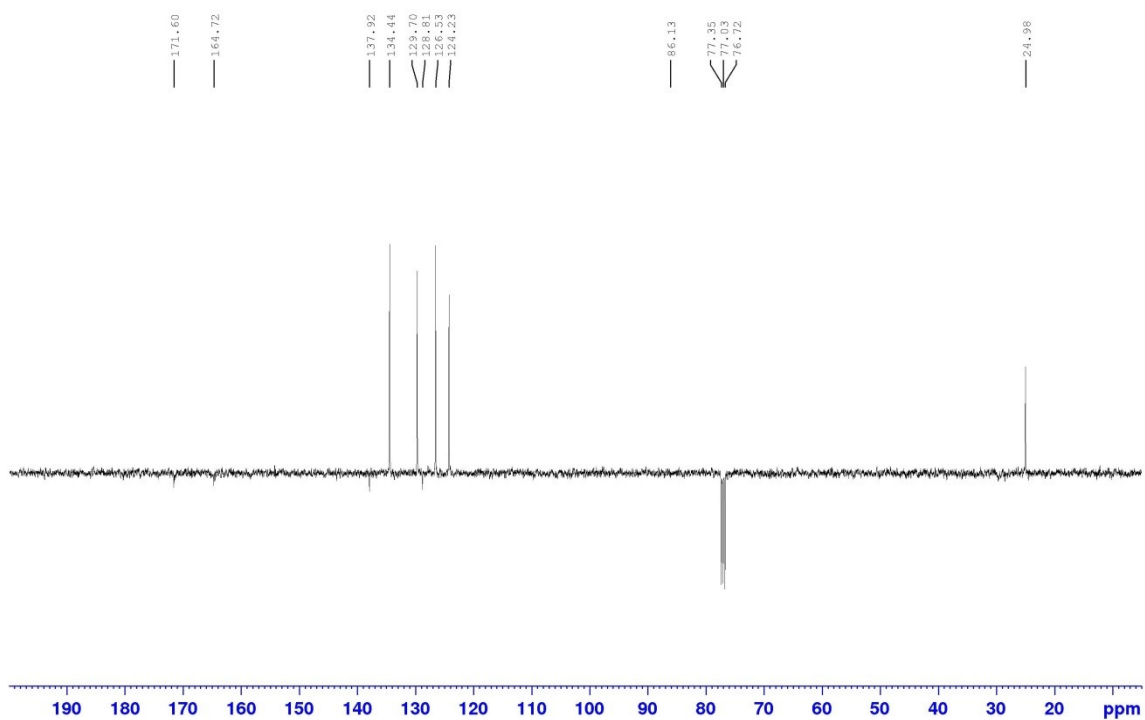

<sup>1</sup>H NMR Compound 4b  
CDCl<sub>3</sub>

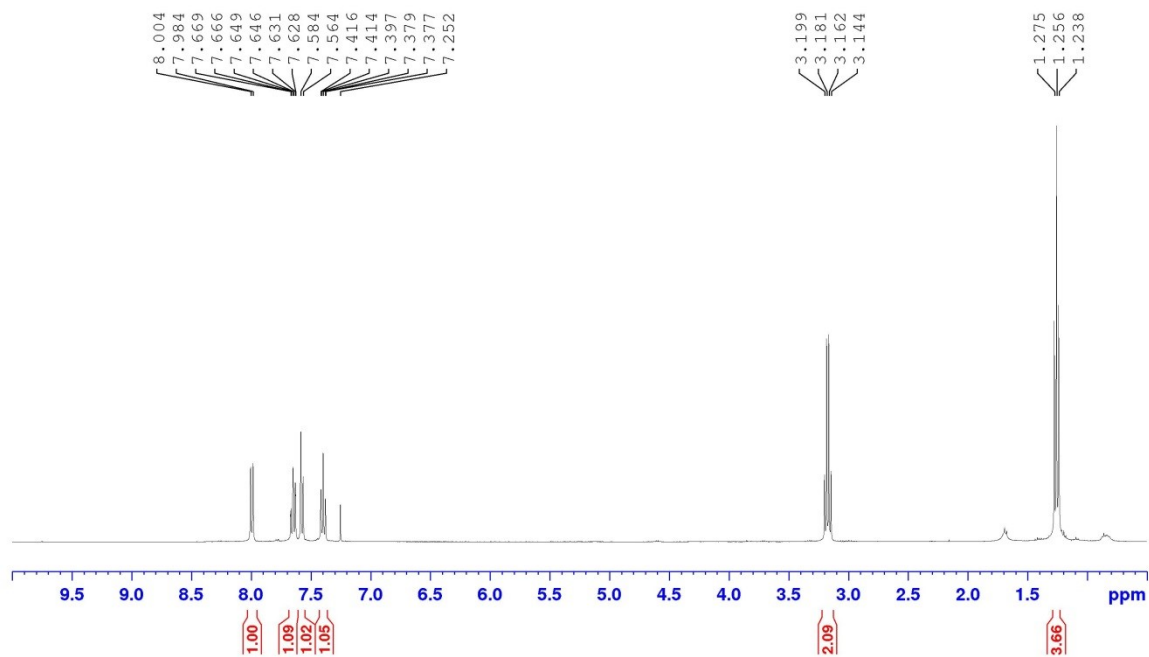

<sup>13</sup>C NMR Compound 4b  
CDCl<sub>3</sub>

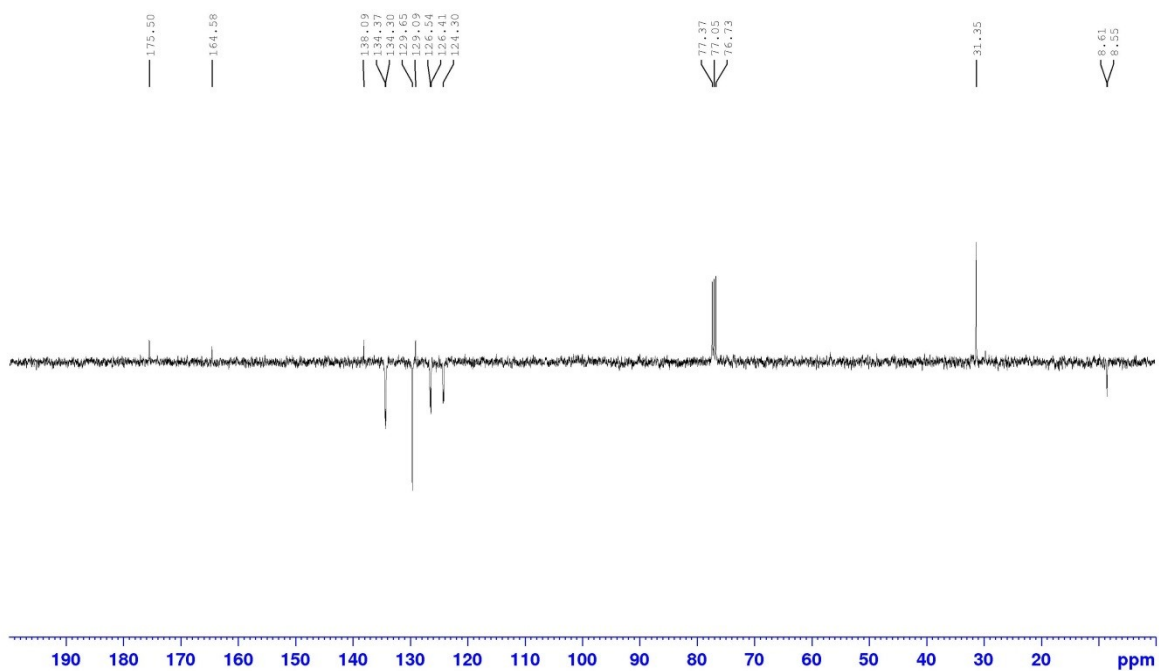

<sup>1</sup>H NMR Compound 4c  
CDCl<sub>3</sub>

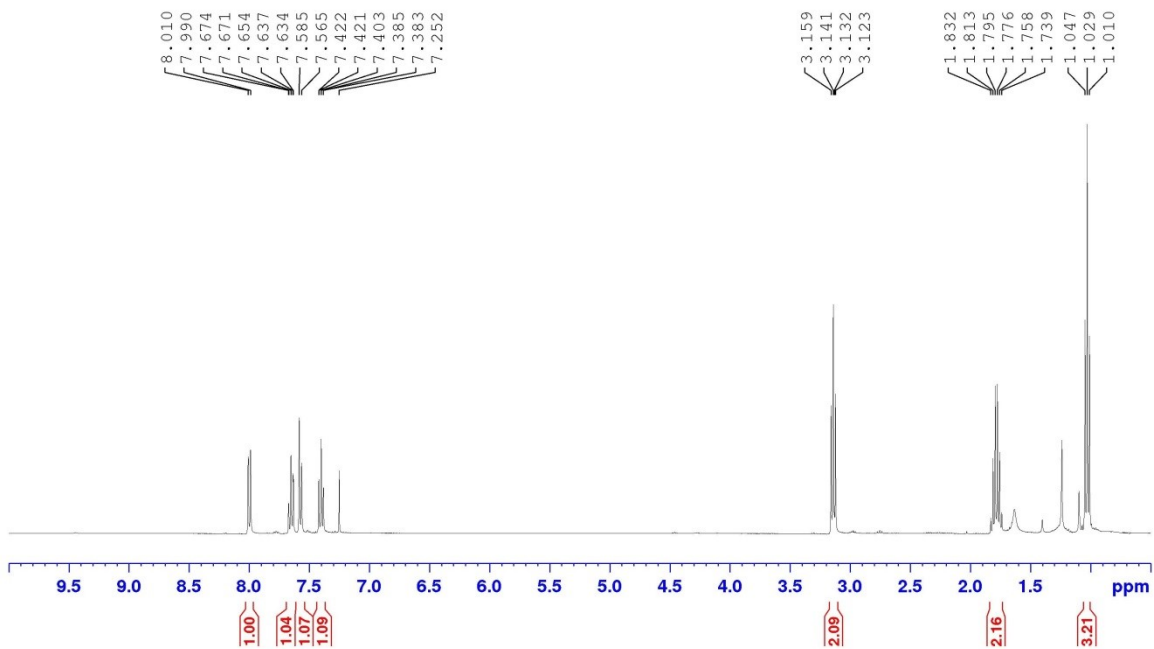

<sup>13</sup>C NMR Compound 4c  
CDCl<sub>3</sub>

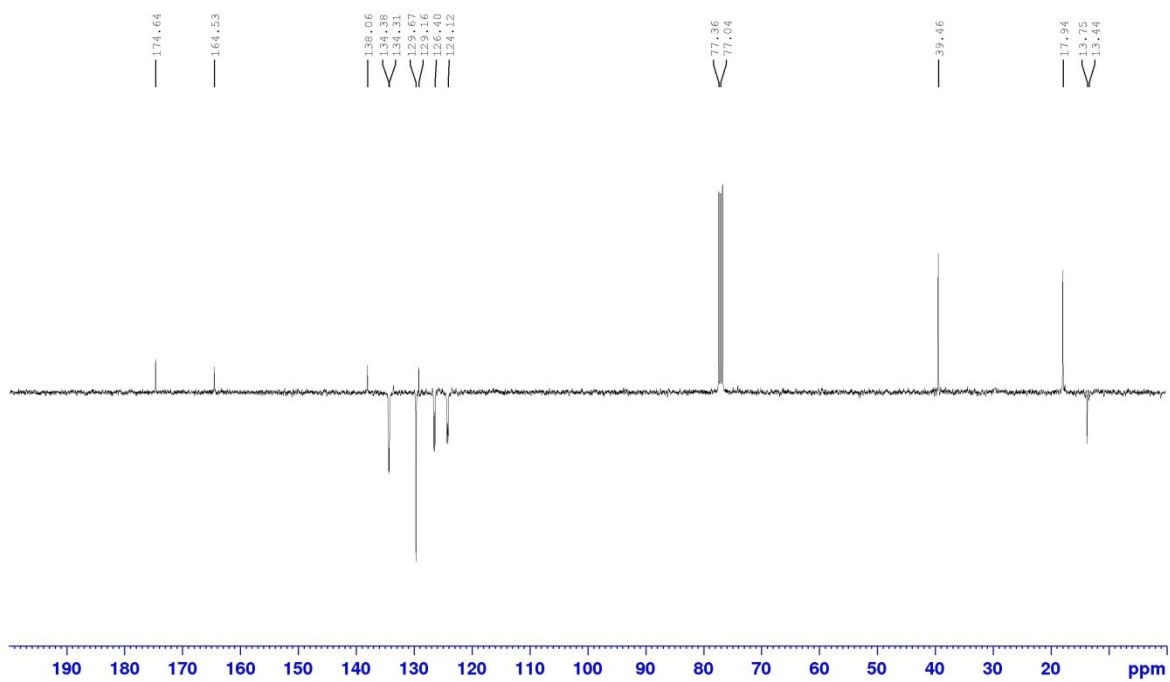



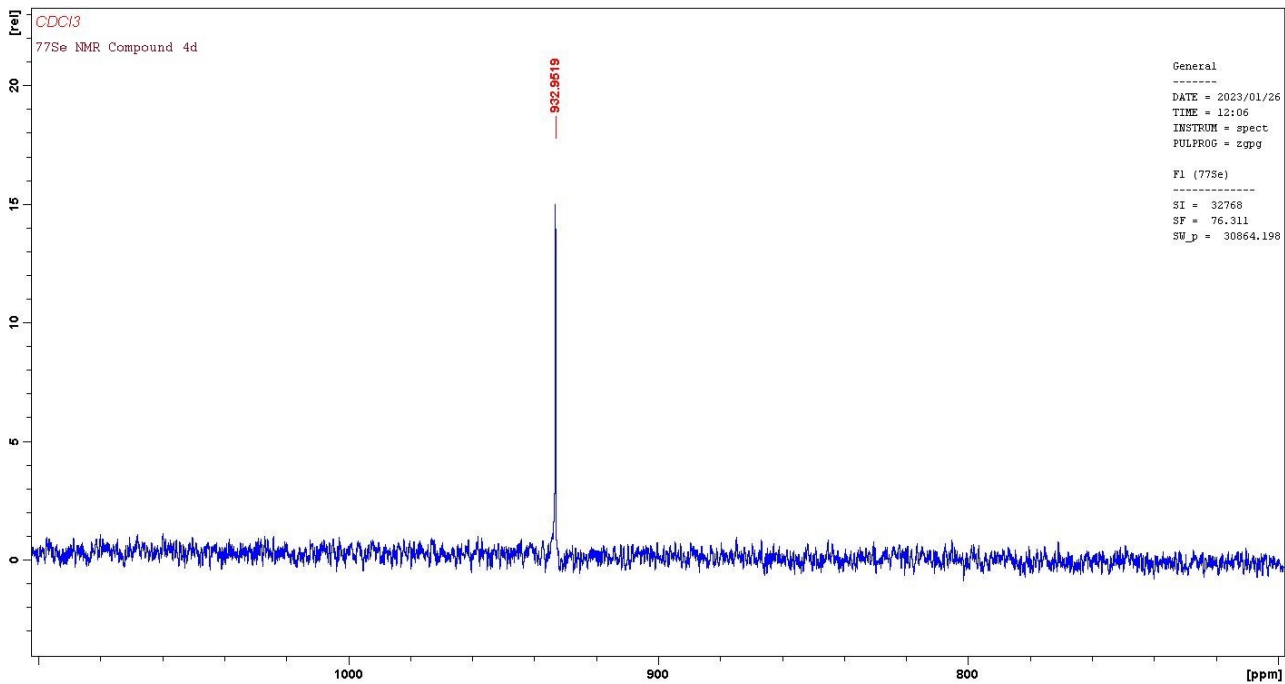

1H NMR Compound 4e  
CDCl<sub>3</sub>

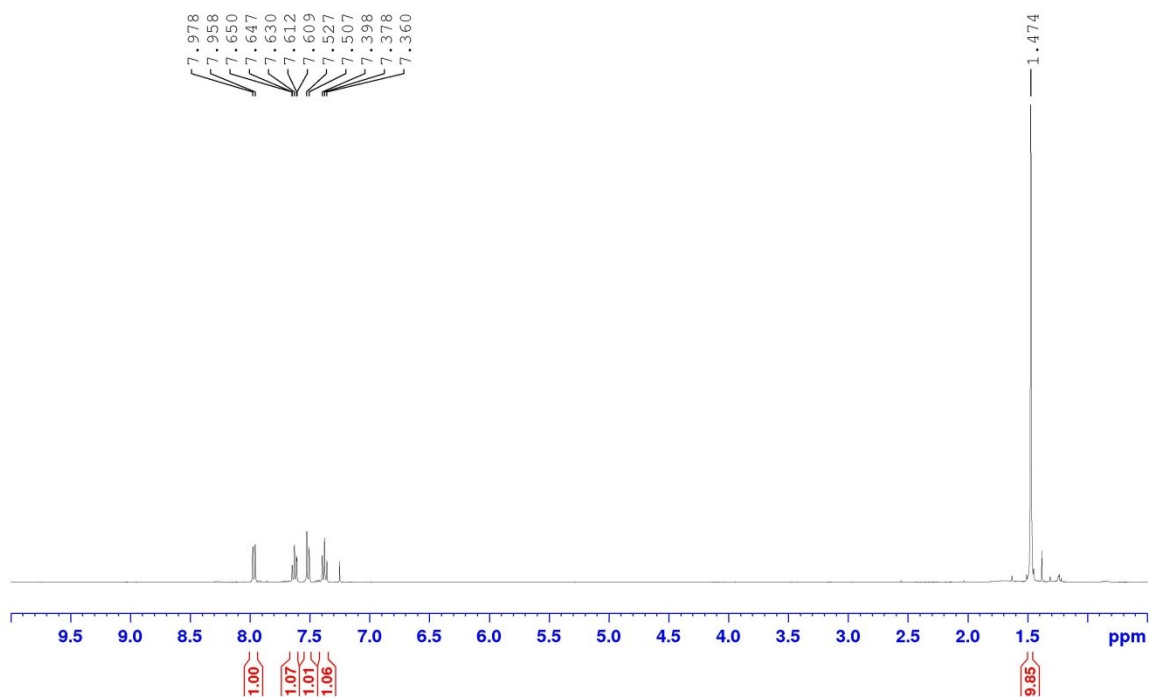



<sup>13</sup>C NMR Compound 4e  
CDCl<sub>3</sub>

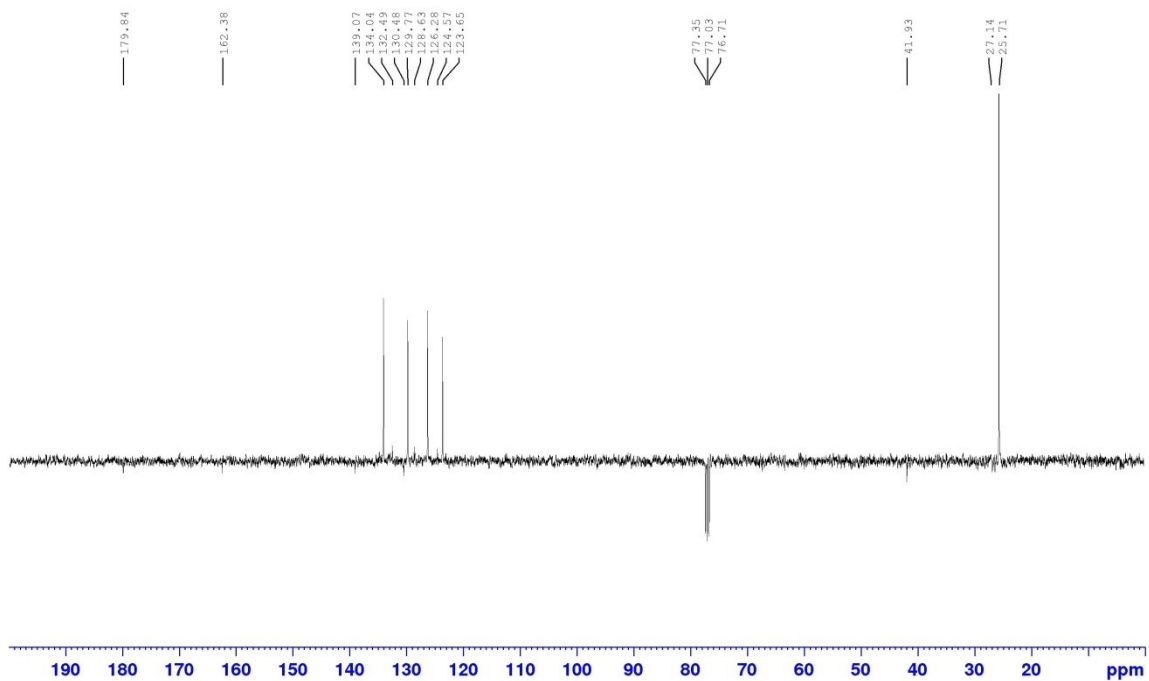

<sup>1</sup>H NMR Compound 4f  
DMSO

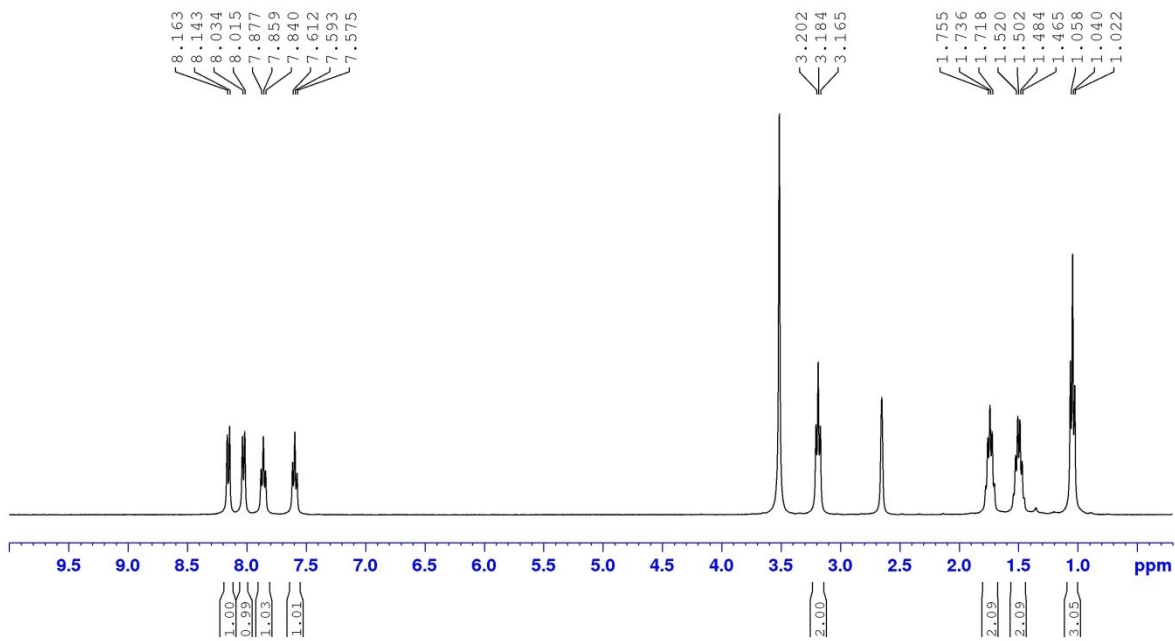

<sup>13</sup>C NMR Compound 4f  
DMSO

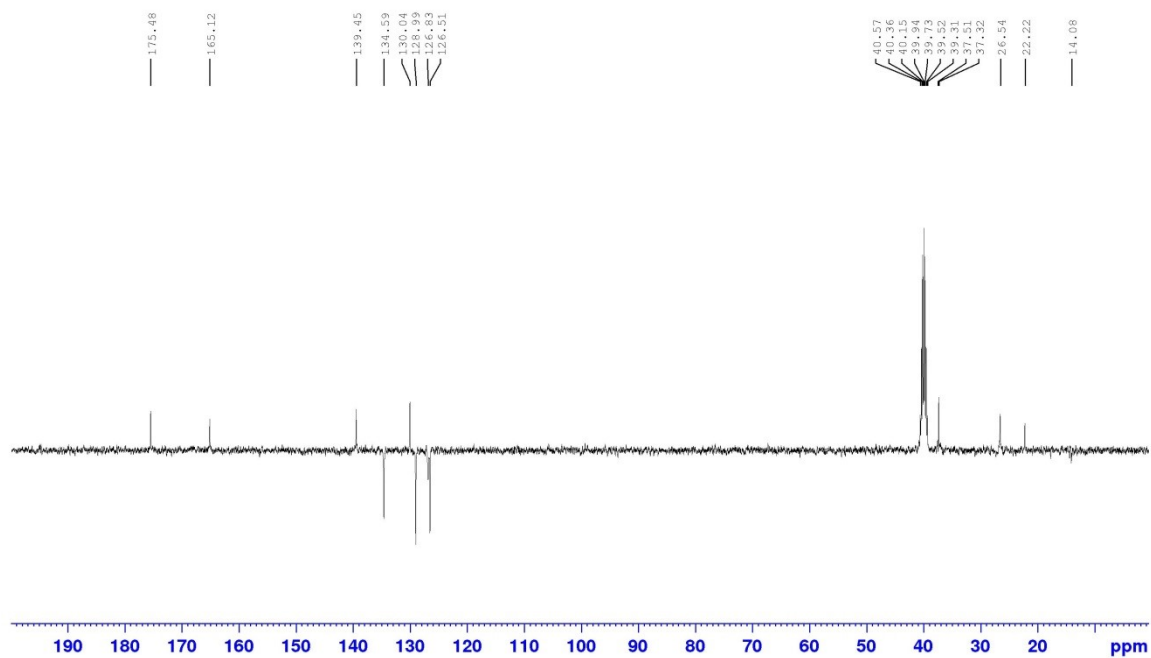

<sup>1</sup>H NMR Compound 4g  
DMSO

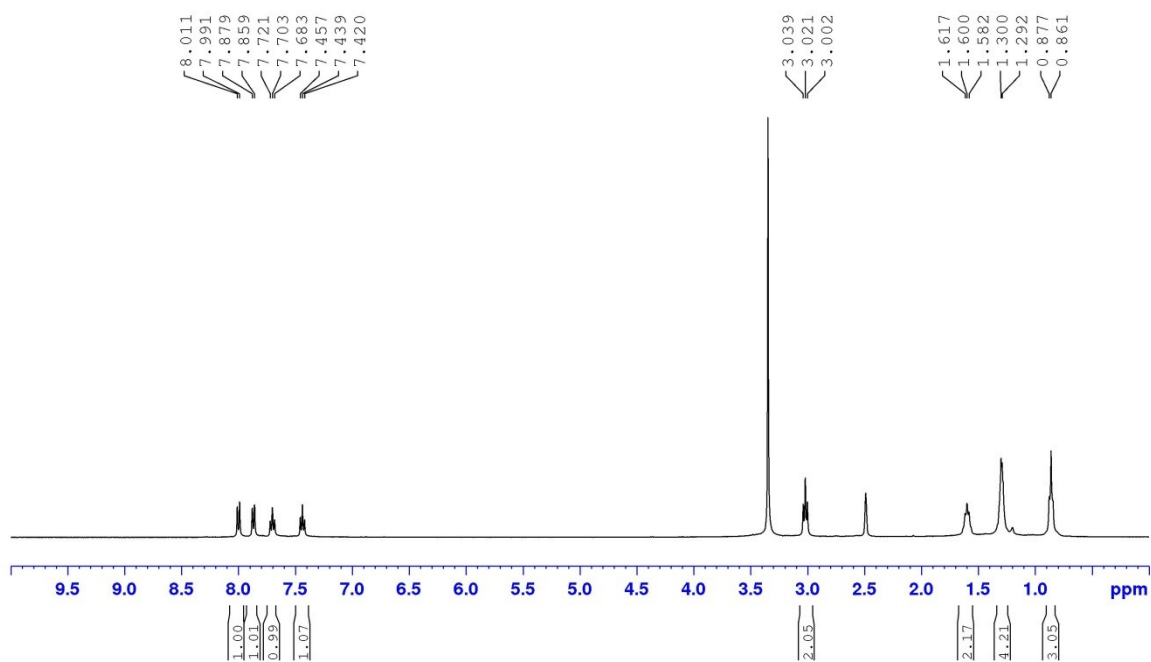

<sup>13</sup>C NMR Compound 4g  
DMSO

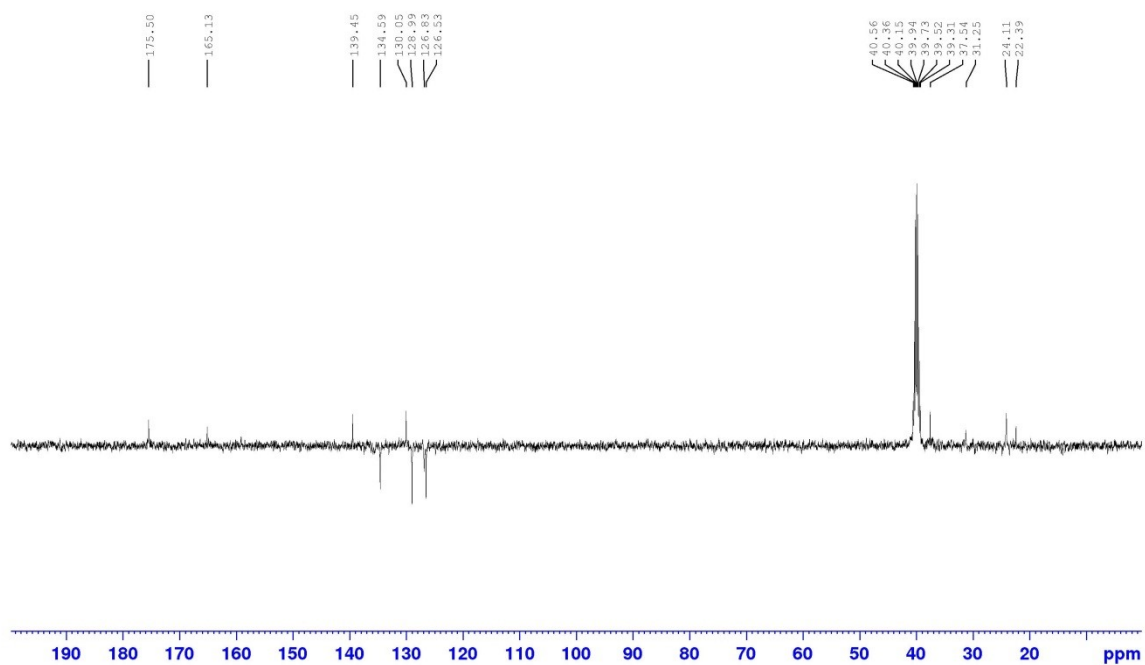

<sup>1</sup>H NMR Compound 4j  
DMSO

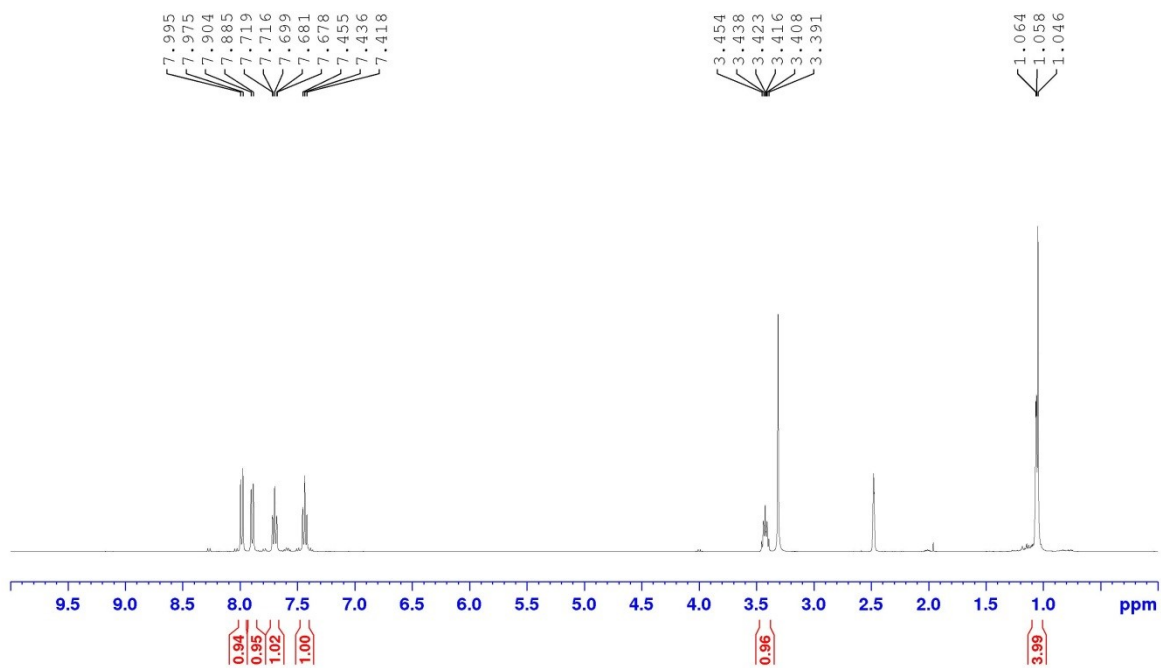

<sup>13</sup>C NMR Compound 4j  
DMSO

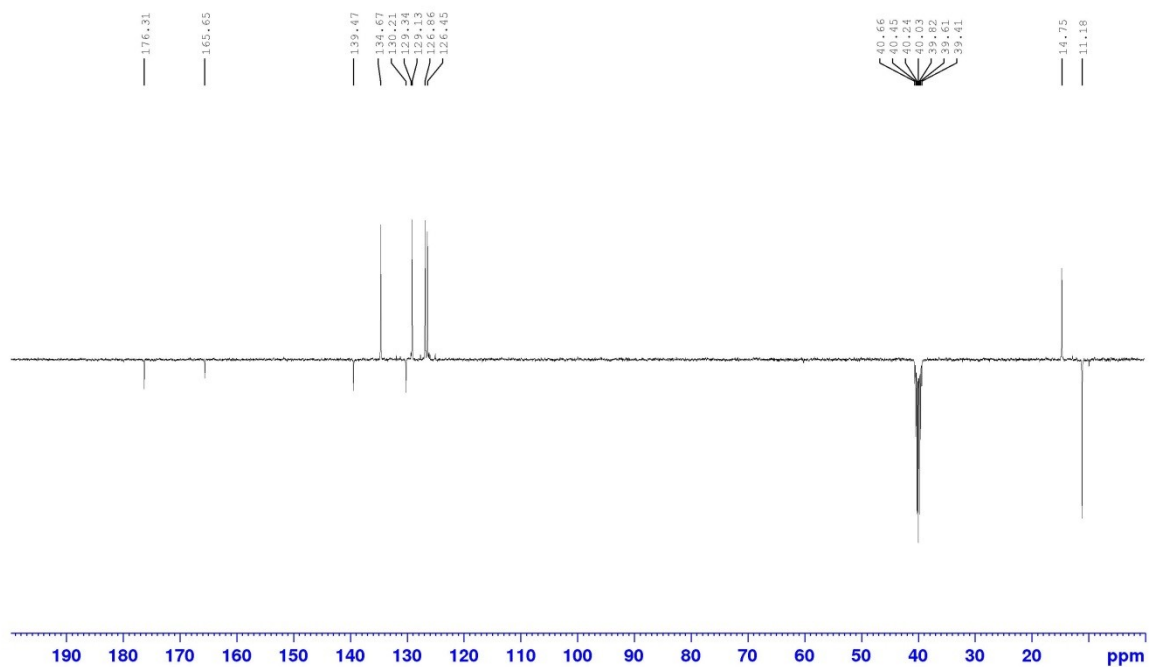

<sup>1</sup>H NMR Compound 4k  
CDCl<sub>3</sub>

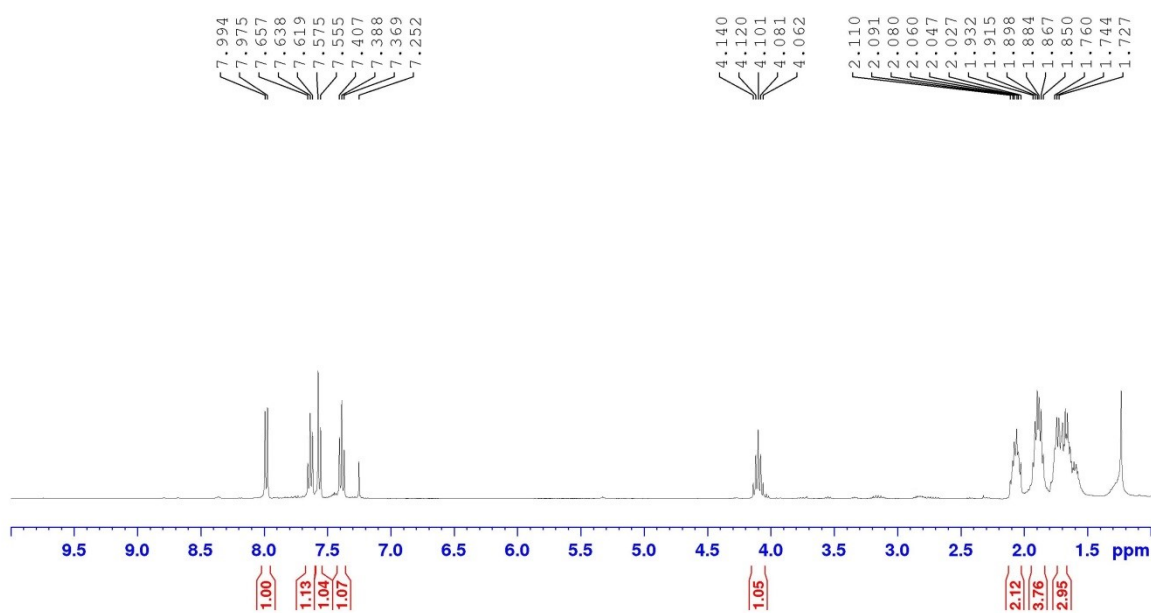

**<sup>13</sup>C NMR Compound 4k**  
CDCl<sub>3</sub>

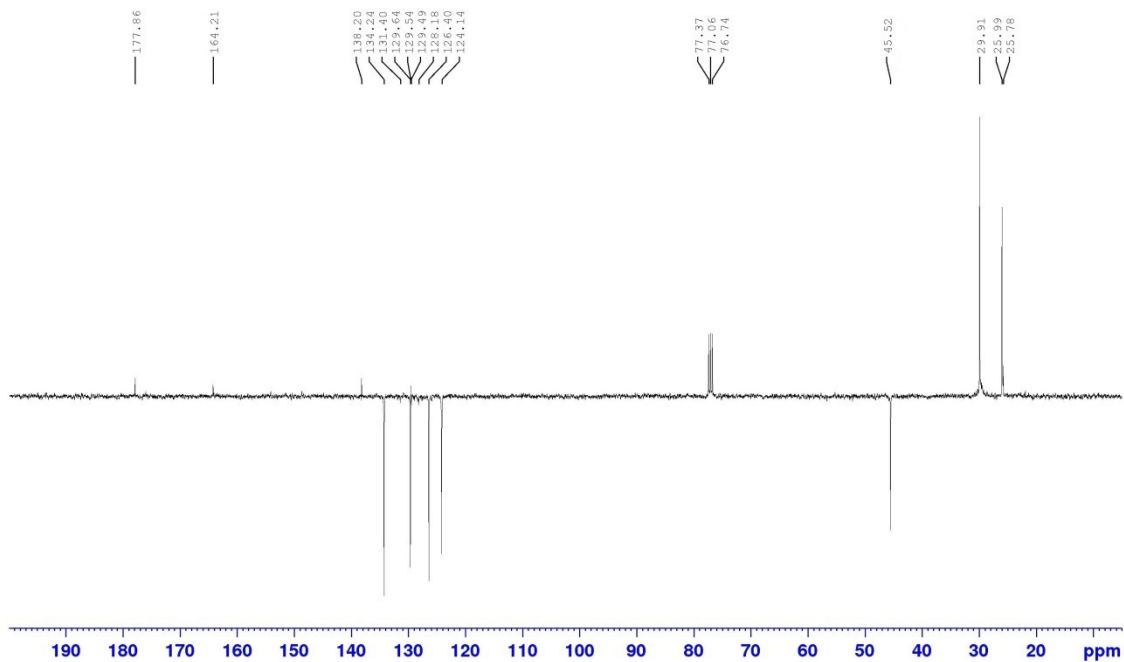

**<sup>1</sup>H NMR Compound 4l**  
CDCl<sub>3</sub>

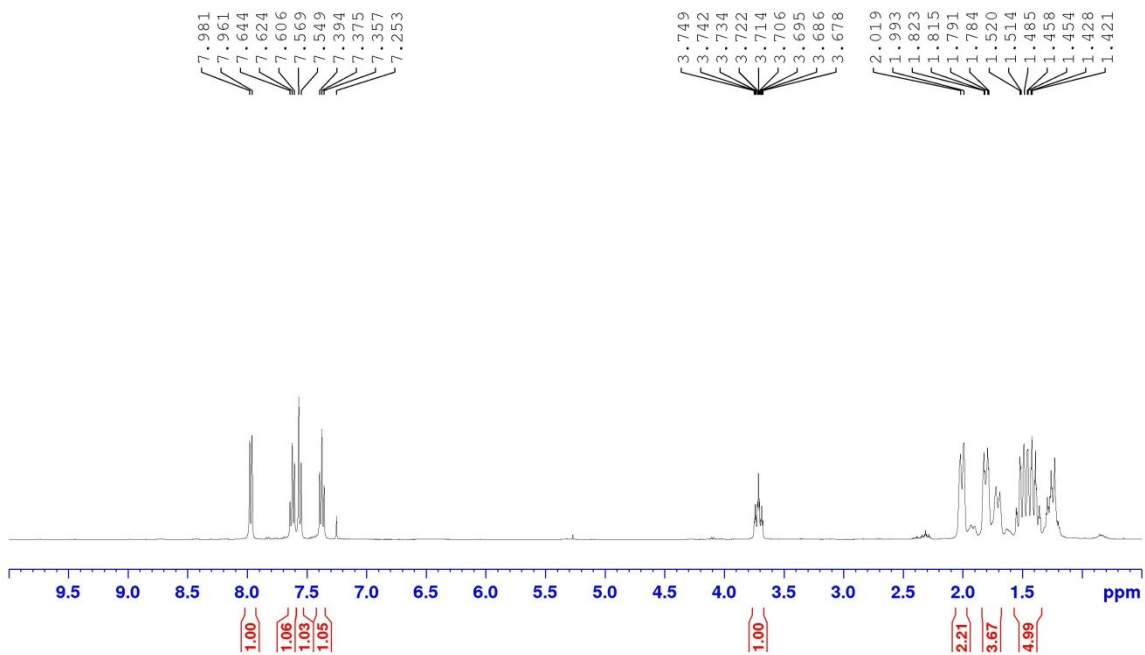

**<sup>13</sup>C NMR Compound 41**  
CDCl<sub>3</sub>

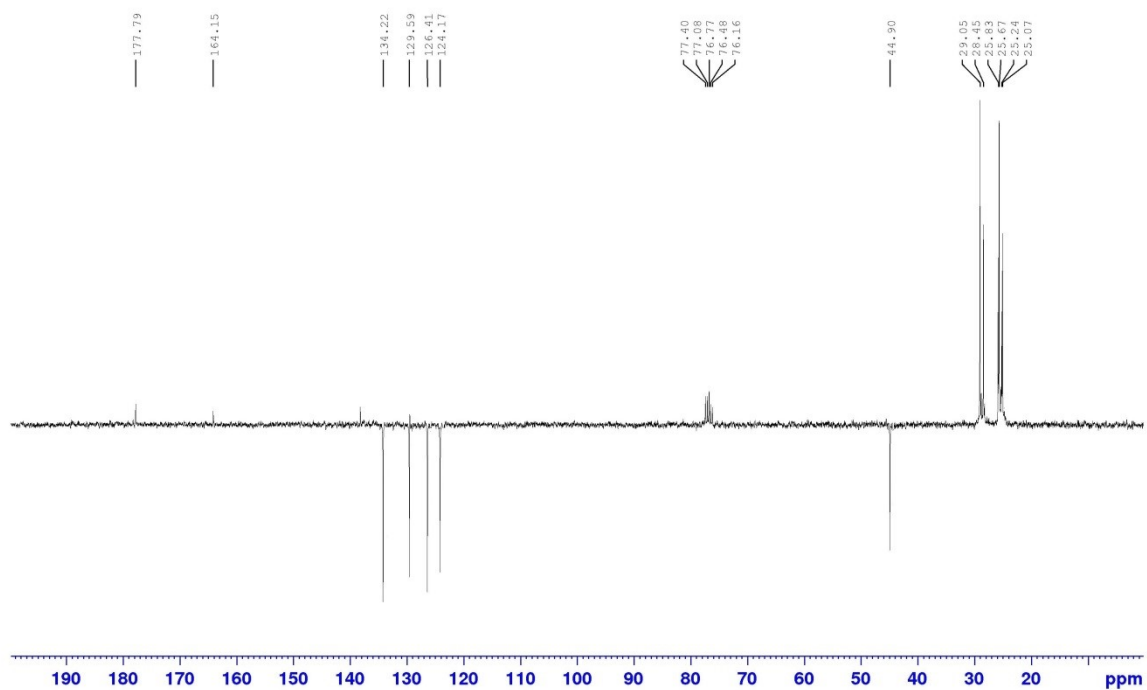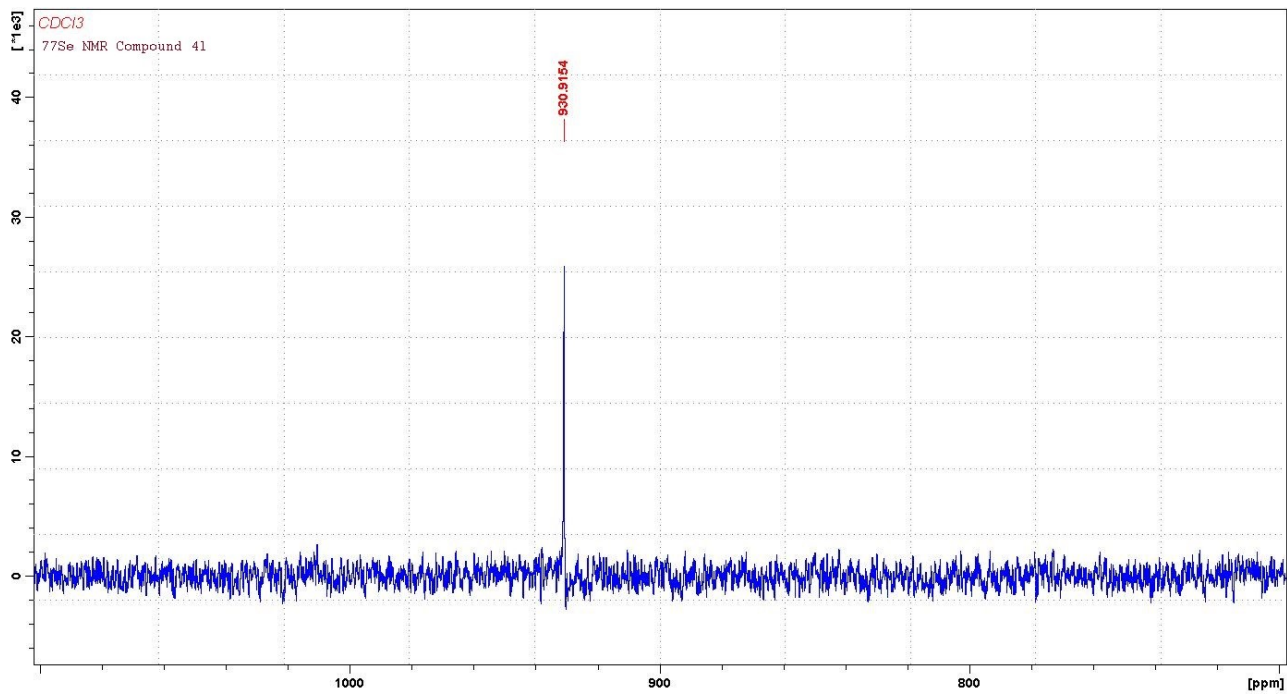

<sup>1</sup>H NMR Compound 4n  
CDCl<sub>3</sub>

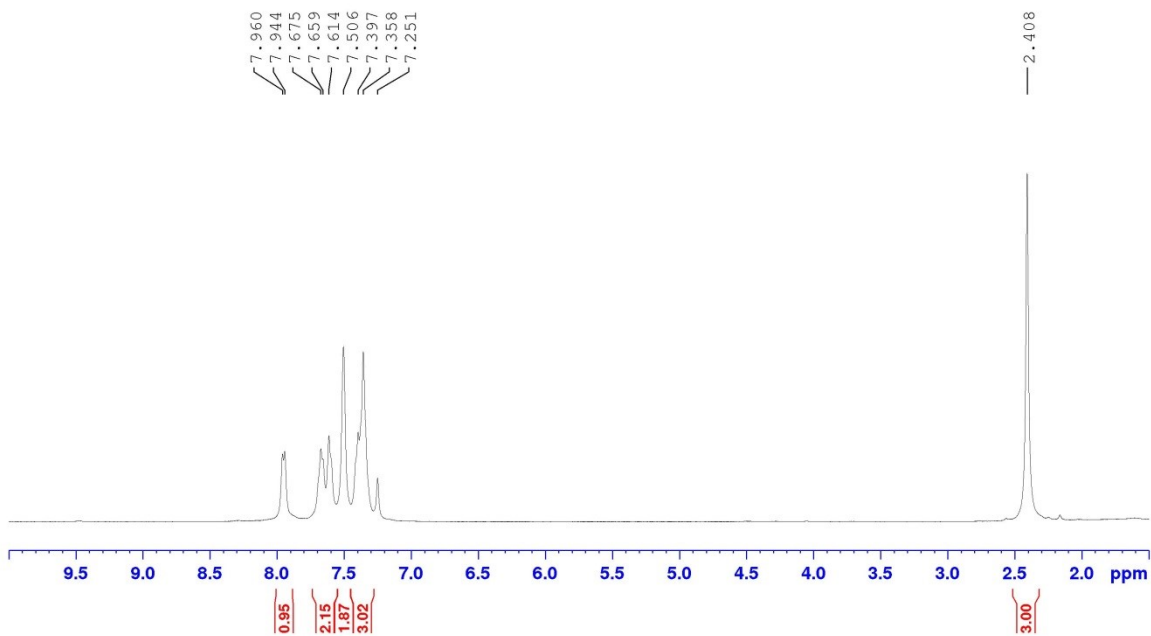

<sup>13</sup>C NMR Compound 4n  
CDCl<sub>3</sub>

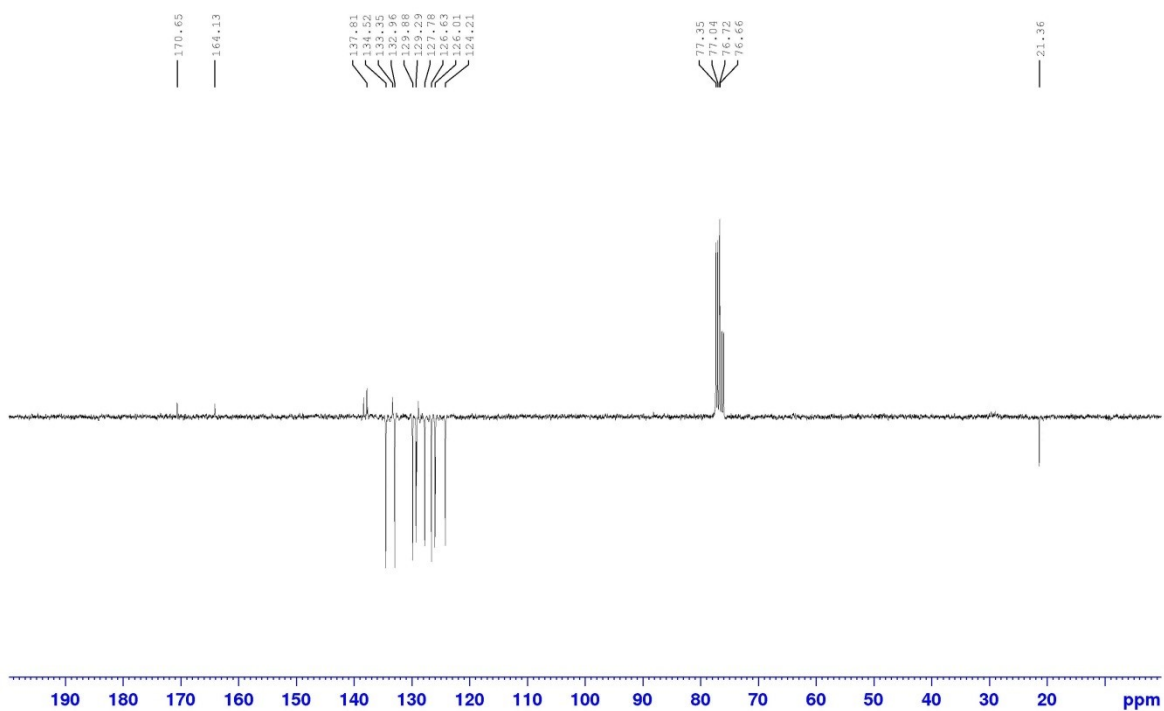

<sup>1</sup>H NMR Compound 6  
DMSO

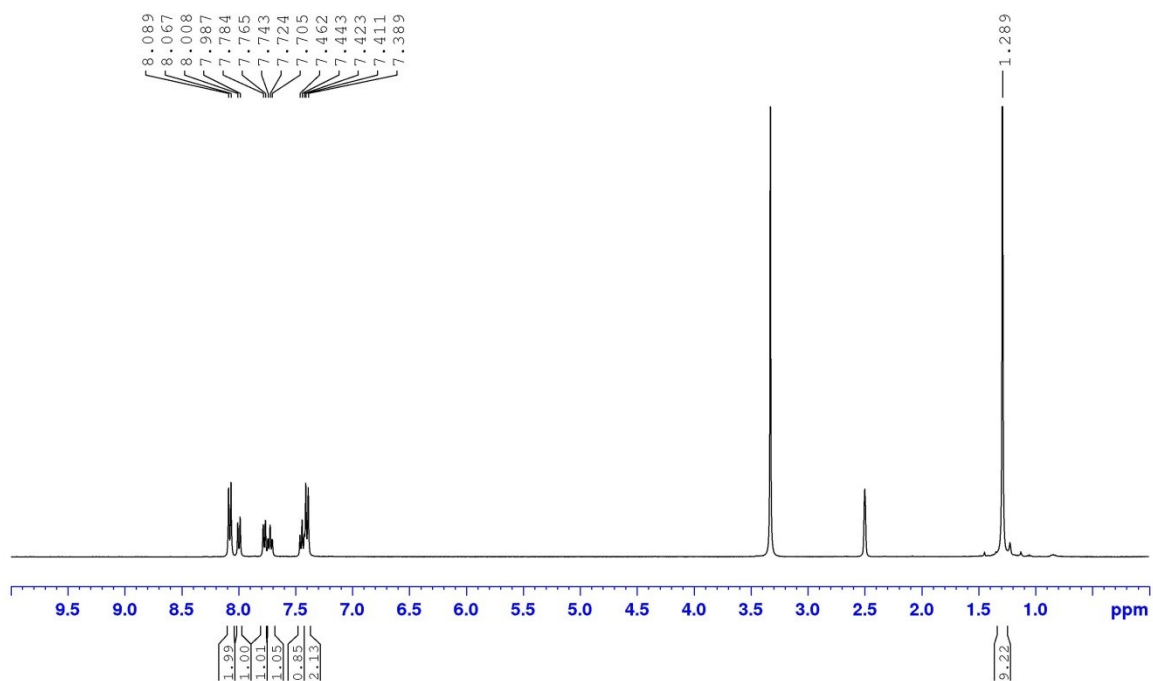

<sup>13</sup>C NMR Compound 6  
DMSO

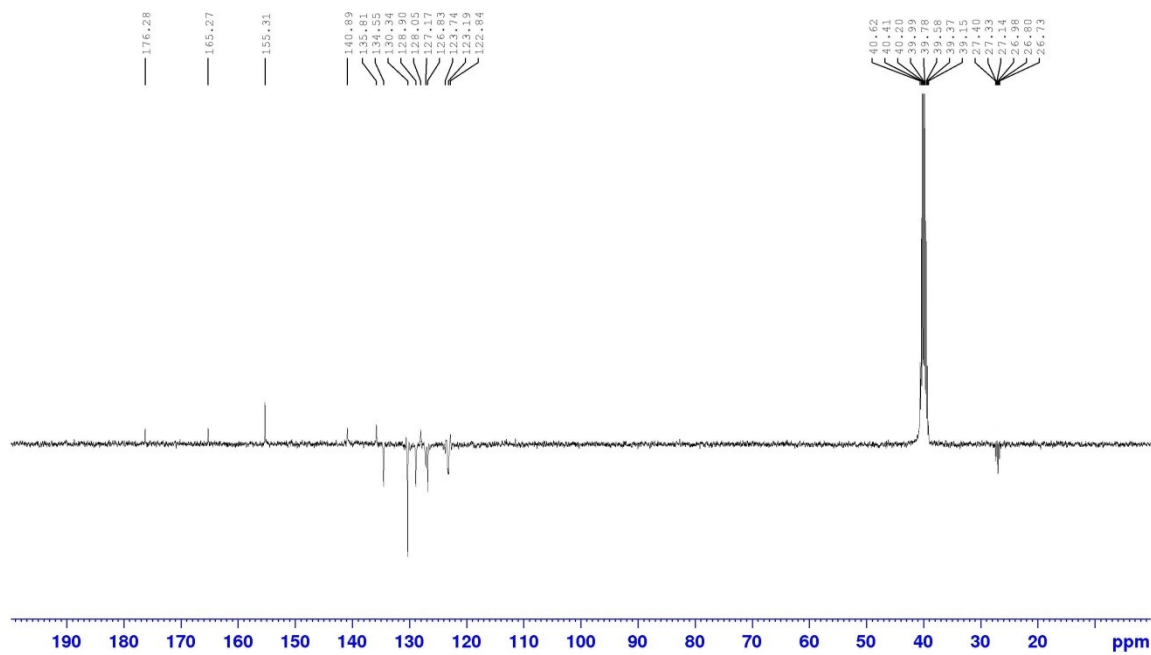



<sup>1</sup>H NMR Compound **8**  
DMSO

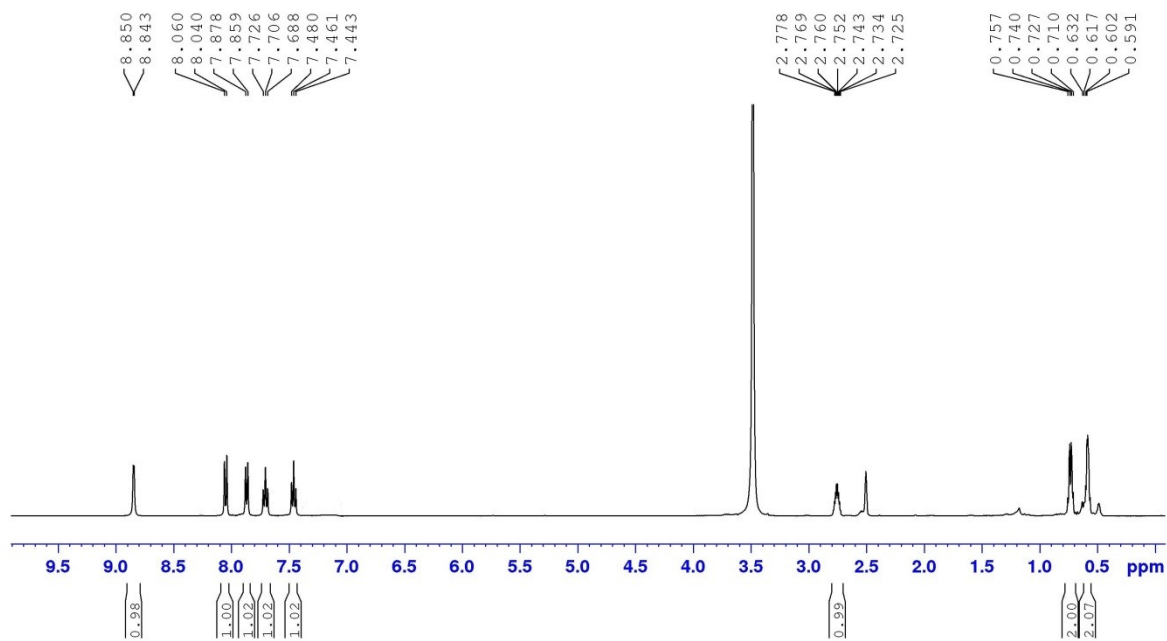

<sup>13</sup>C NMR Compound **8**  
DMSO

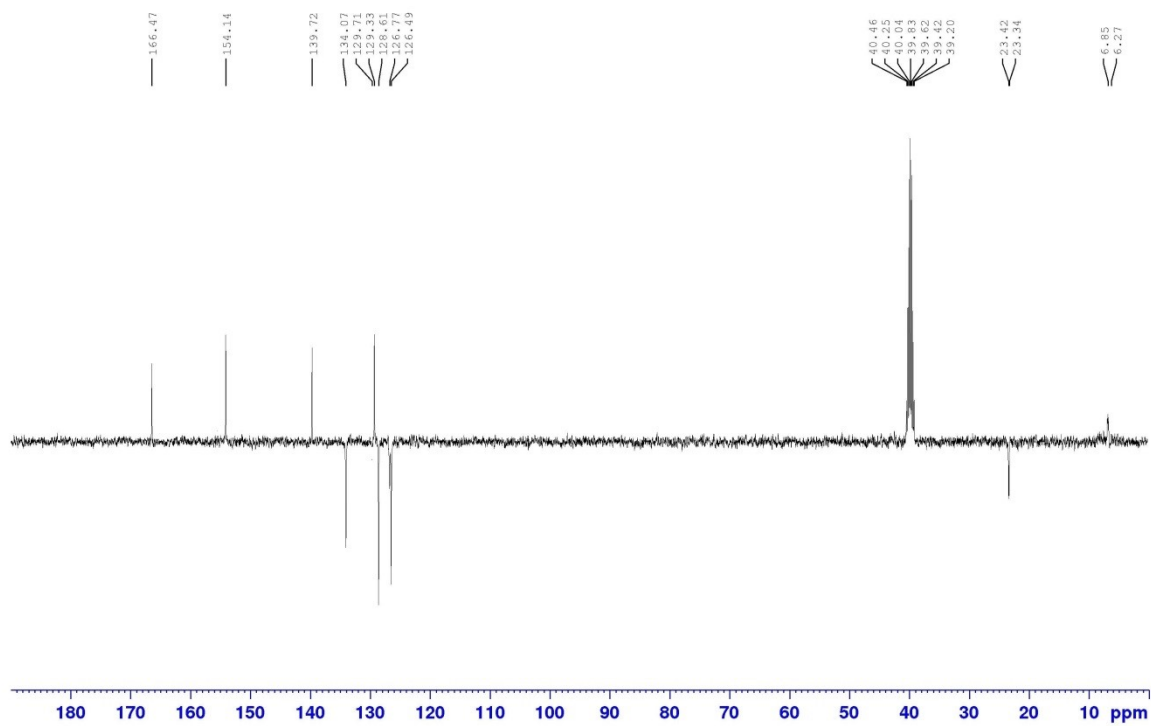

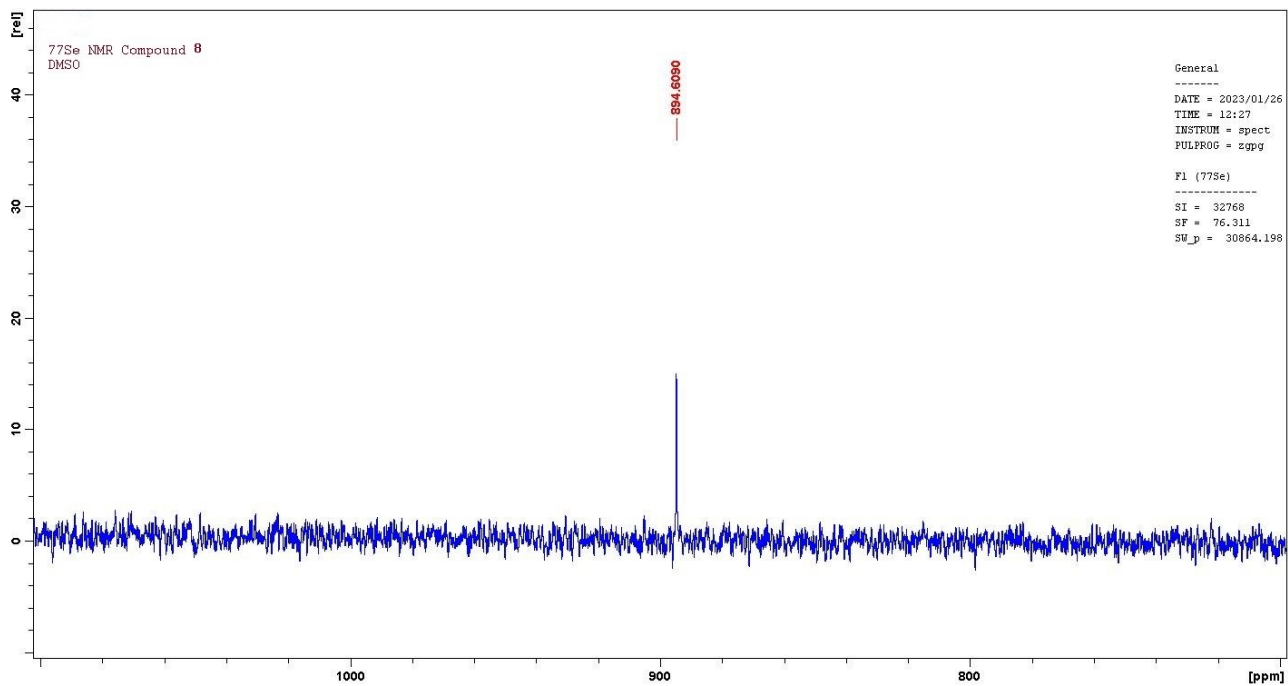

## 2. Mass Spectrometry spectra

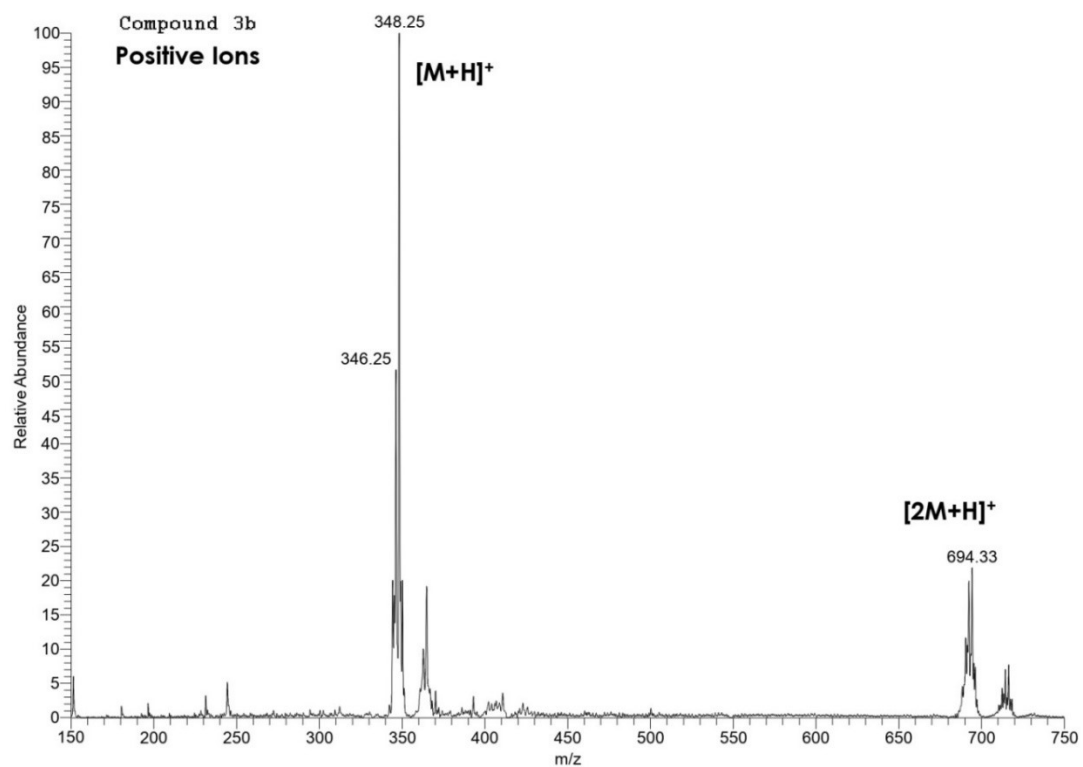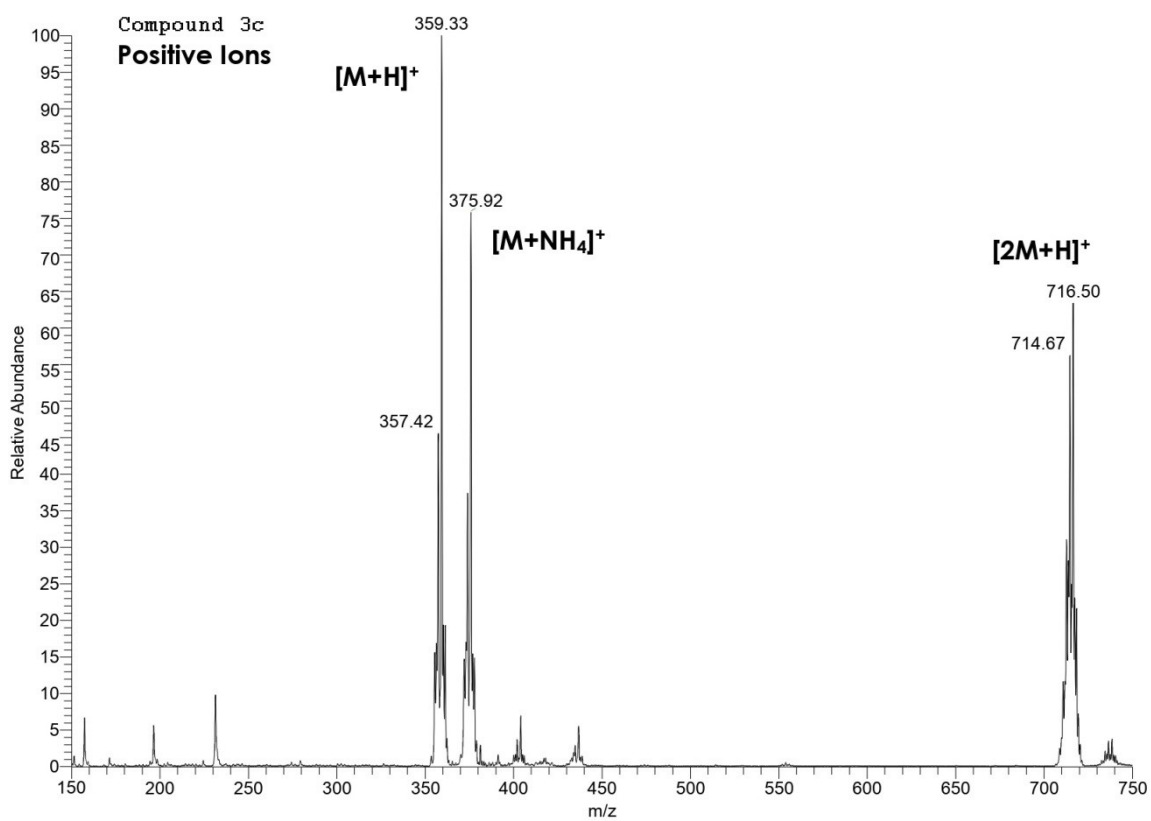

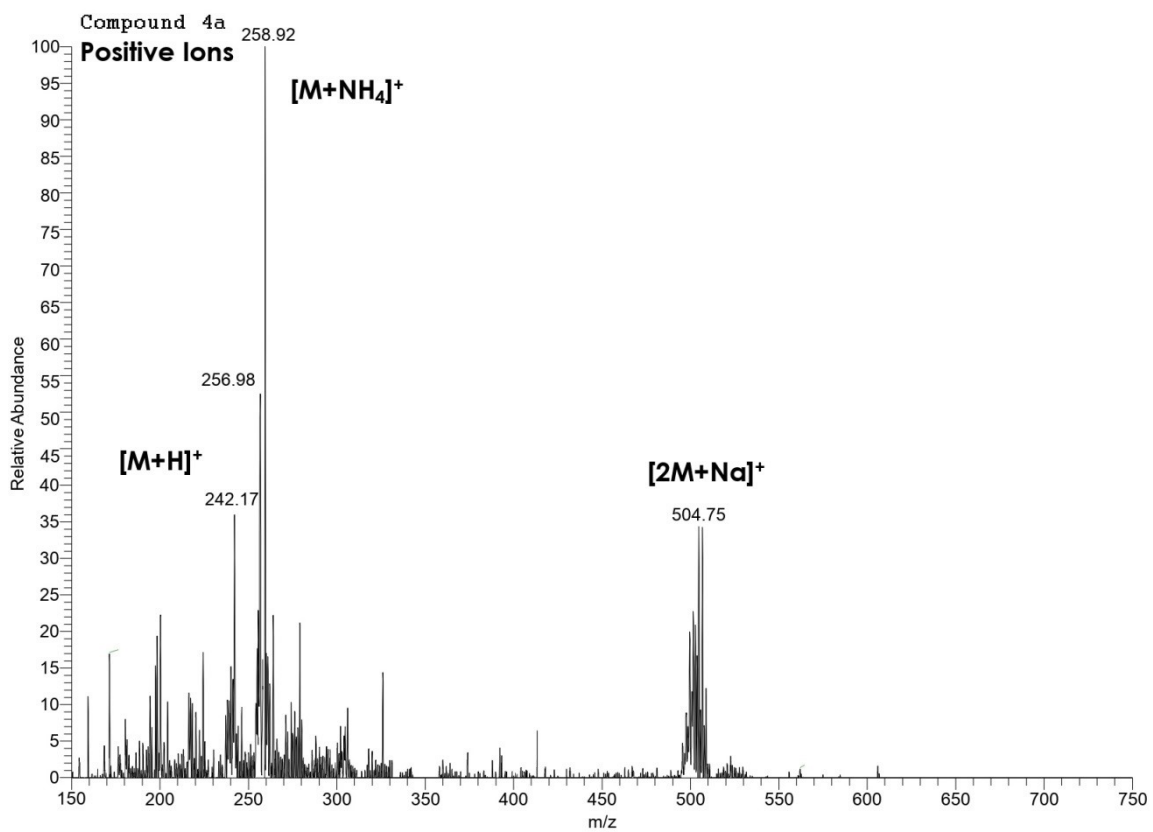

4b #903-914 T: ITMS + p ESI Full ms [150.00-750.00]

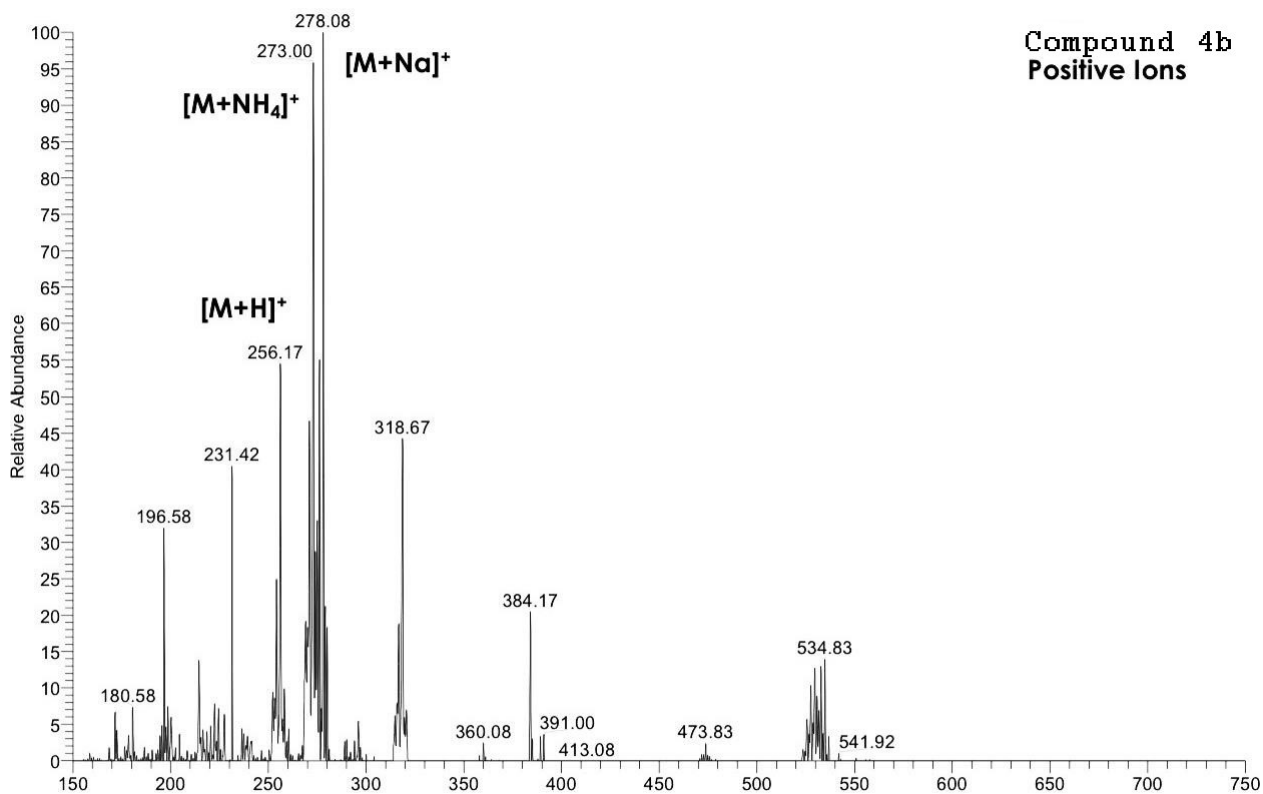

4c #994-1005 T: ITMS + p ESI Full ms [150.00-750.00]

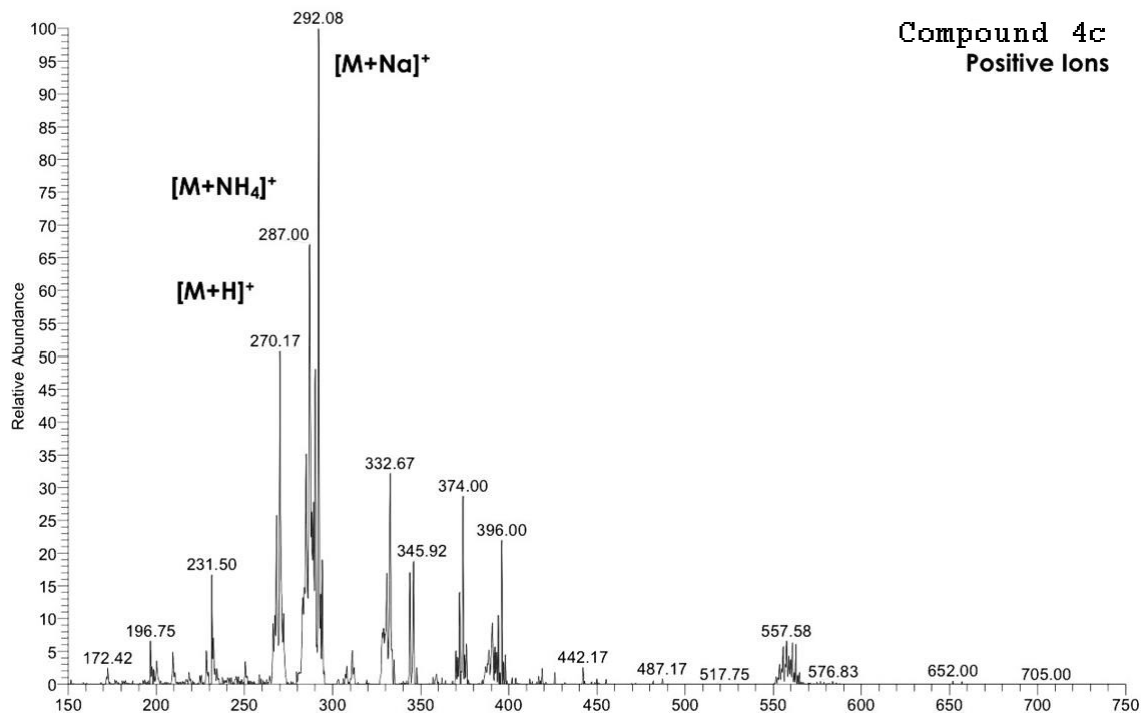

4d #979-991 T: ITMS + p ESI Full ms [150.00-750.00]

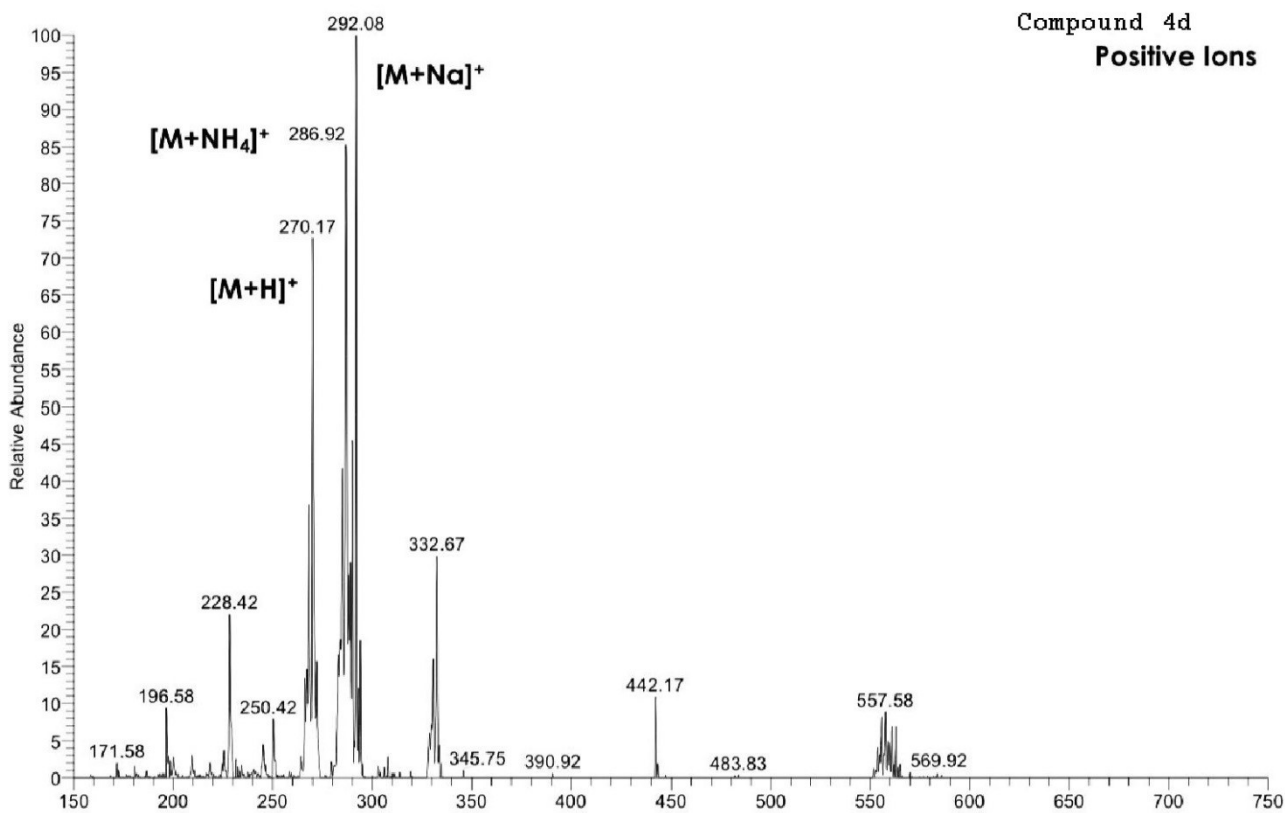

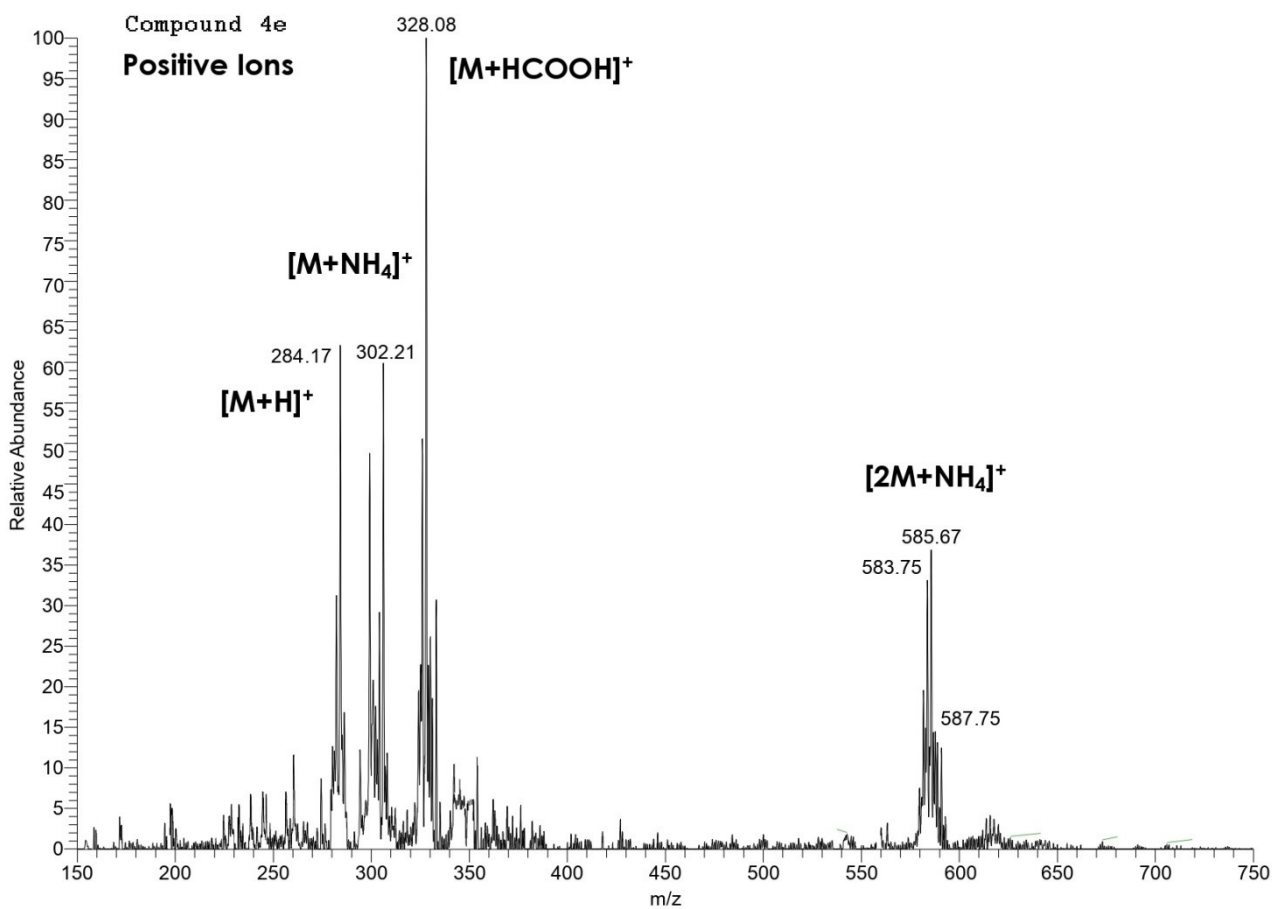

4f #1070-1085 T: ITMS + p ESI Full ms [150.00-750.00]

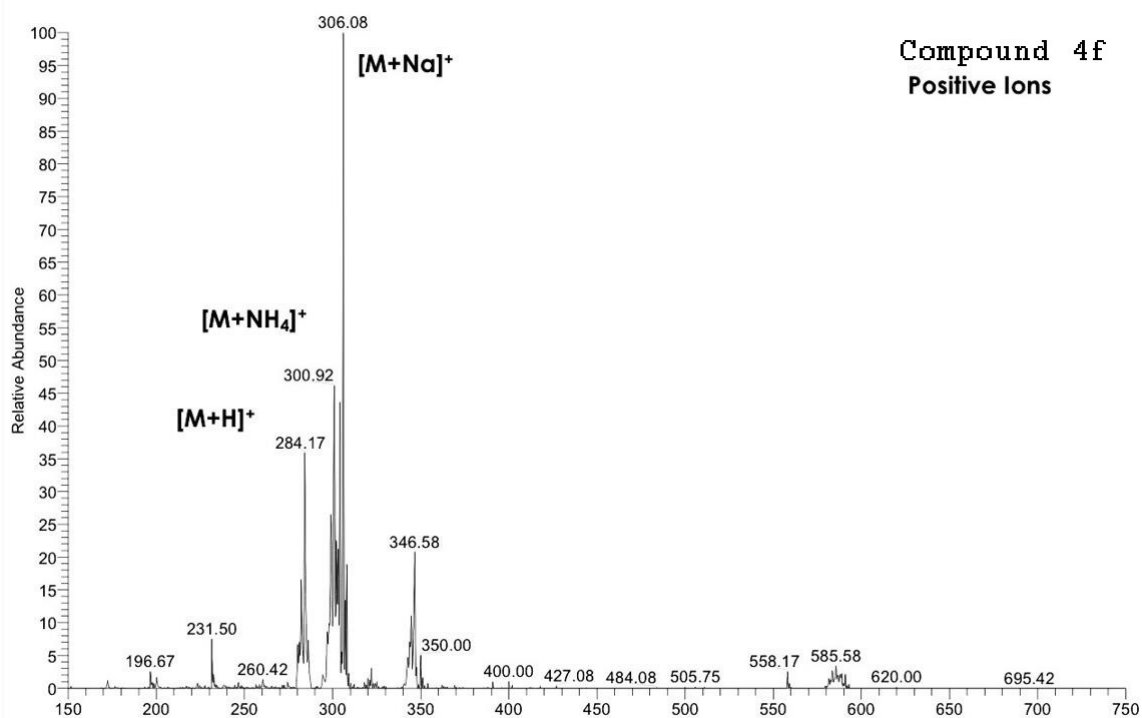

4g #1136-1147 T: ITMS + p ESI Full ms [150.00-750.00]

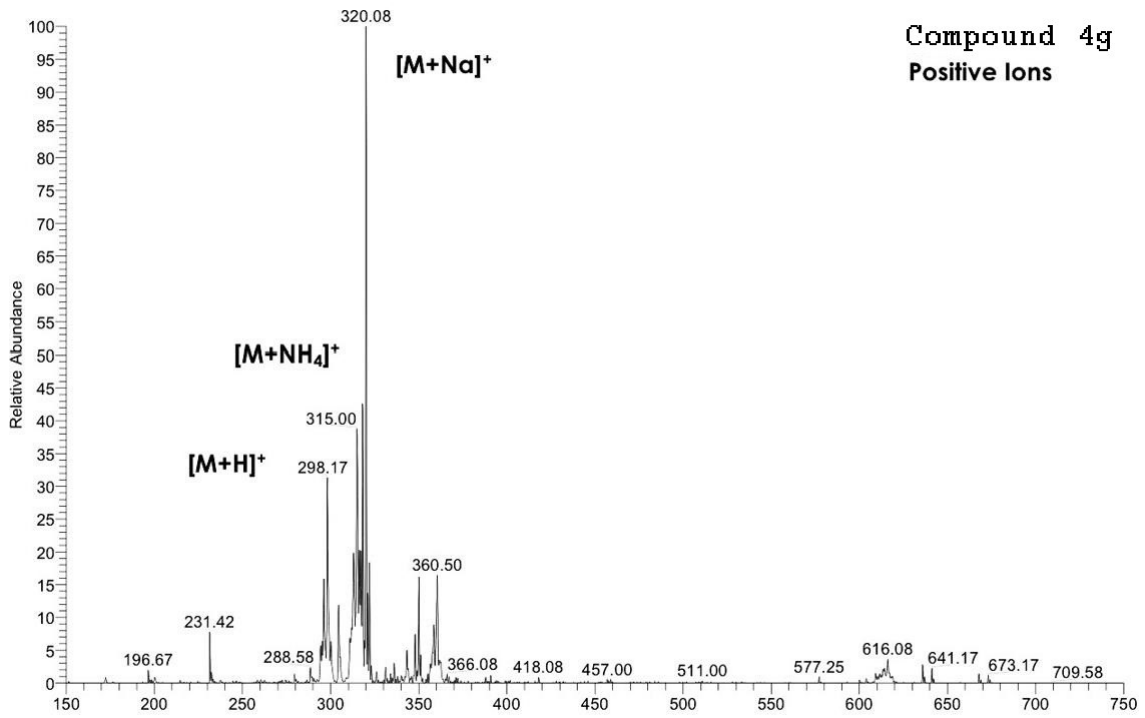

4i #858-886 T: ITMS + p ESI Full ms [150.00-750.00]

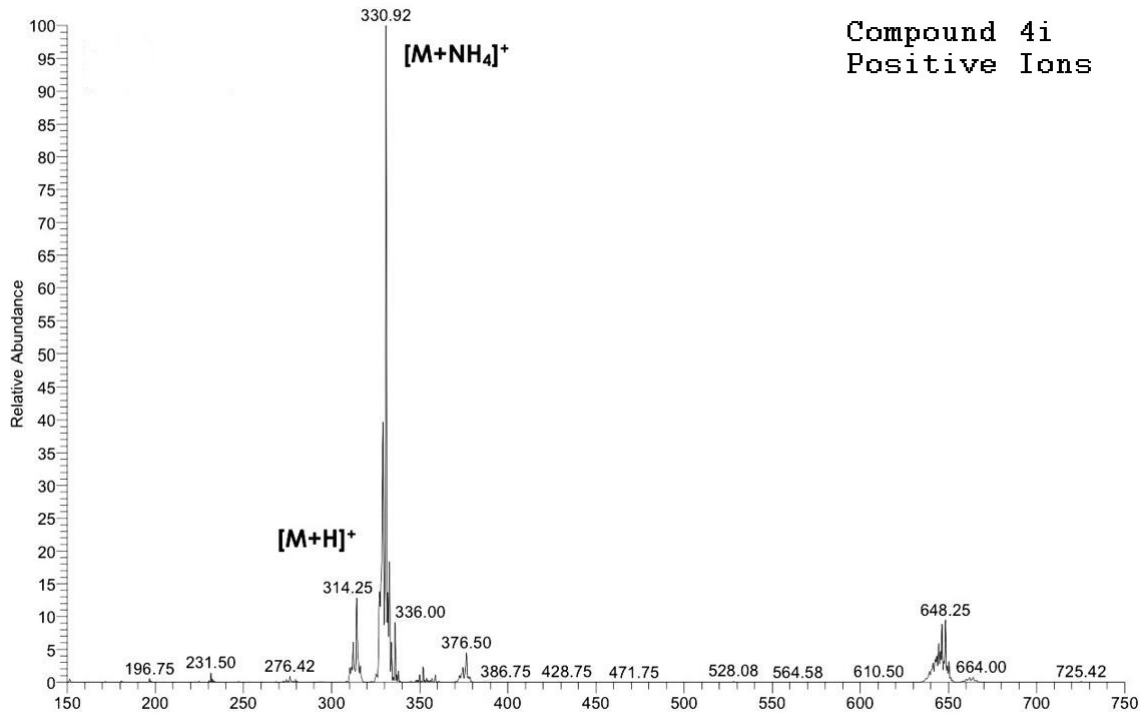

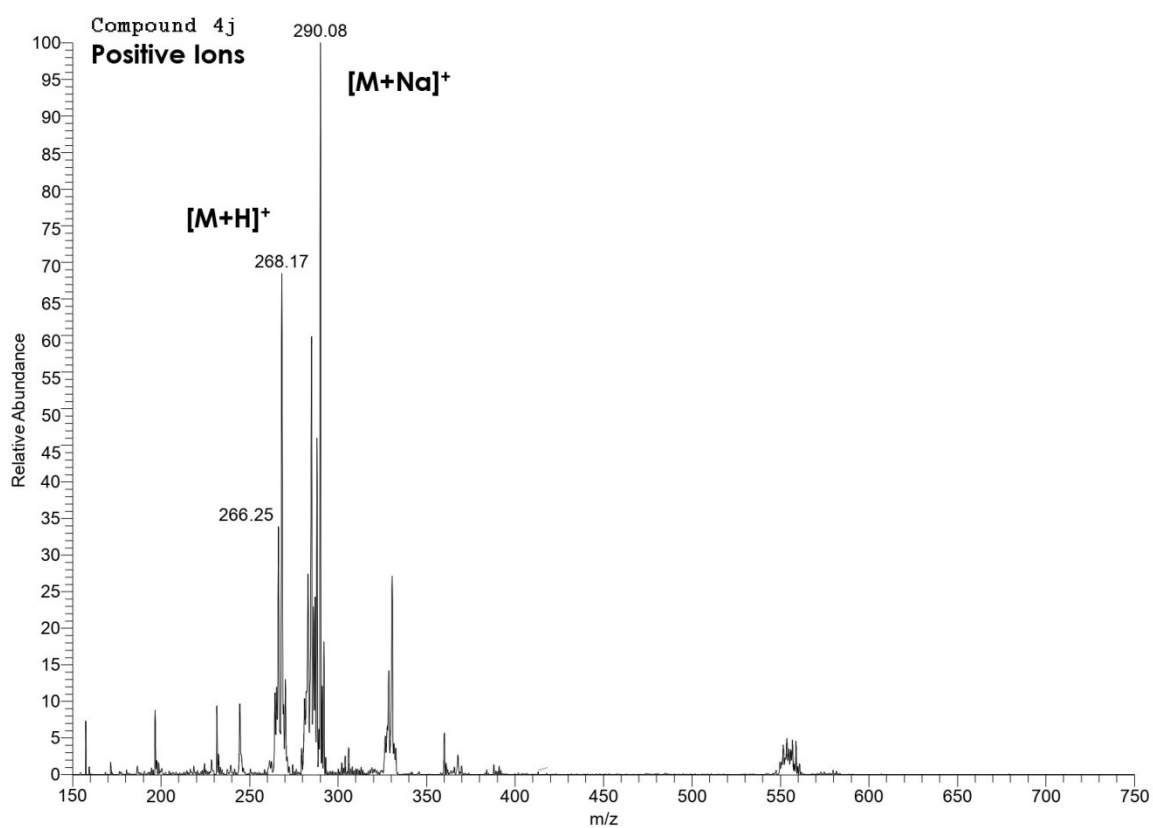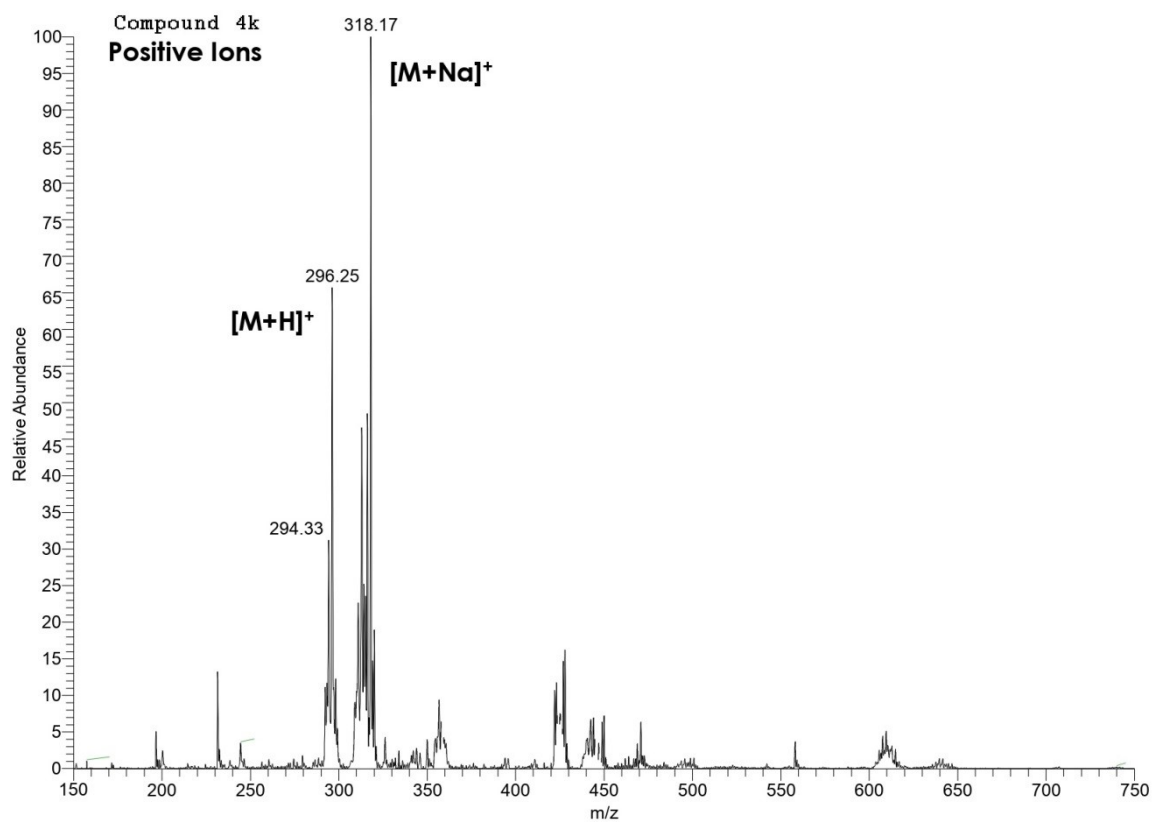



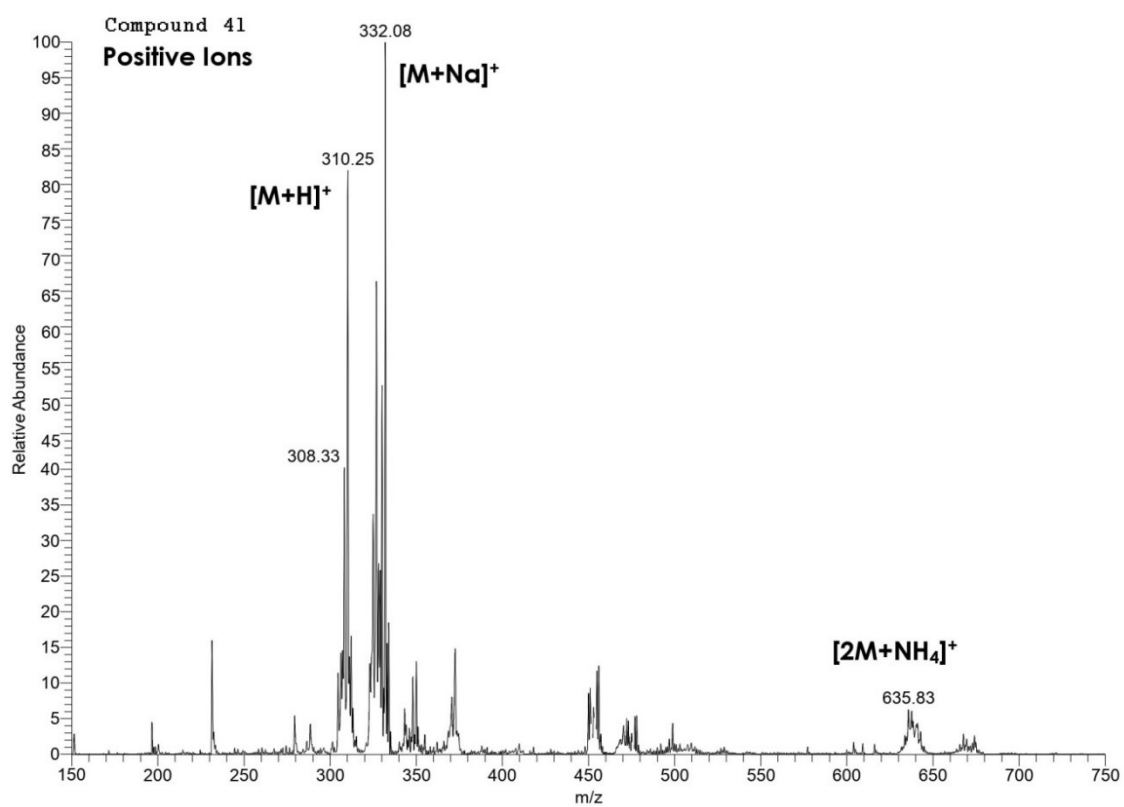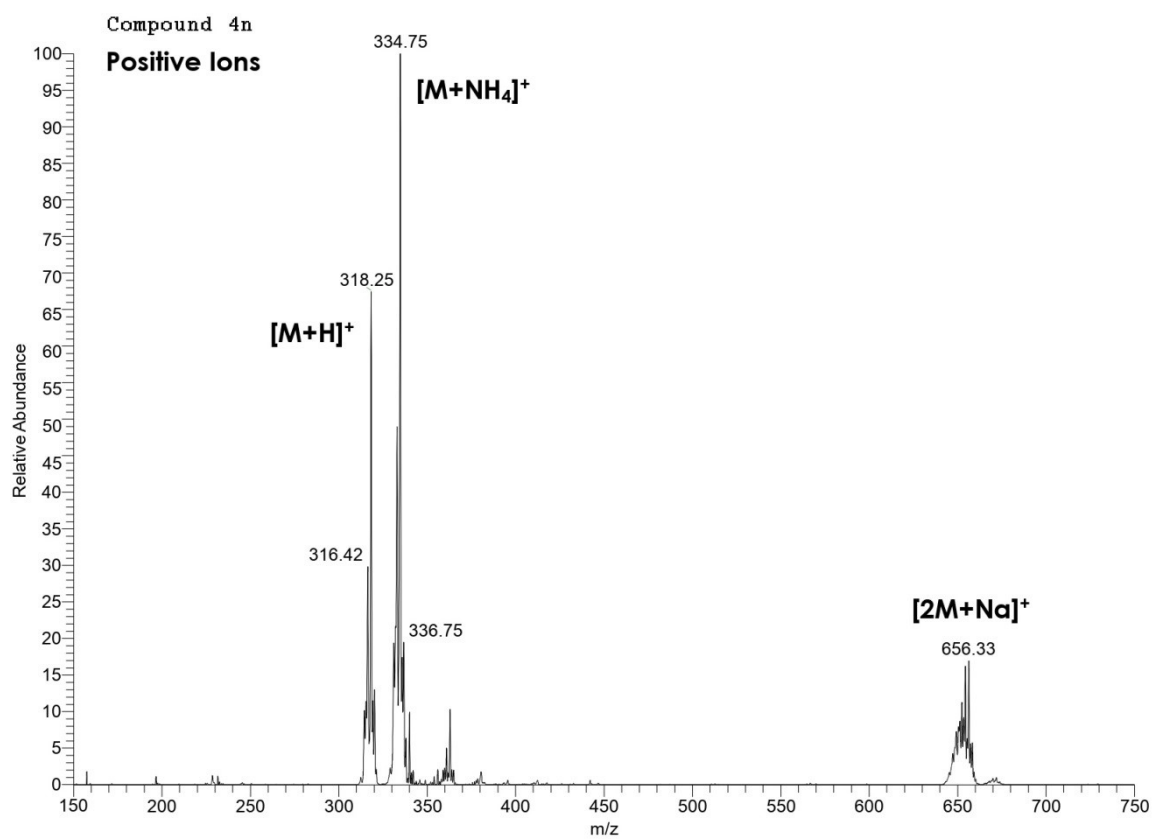

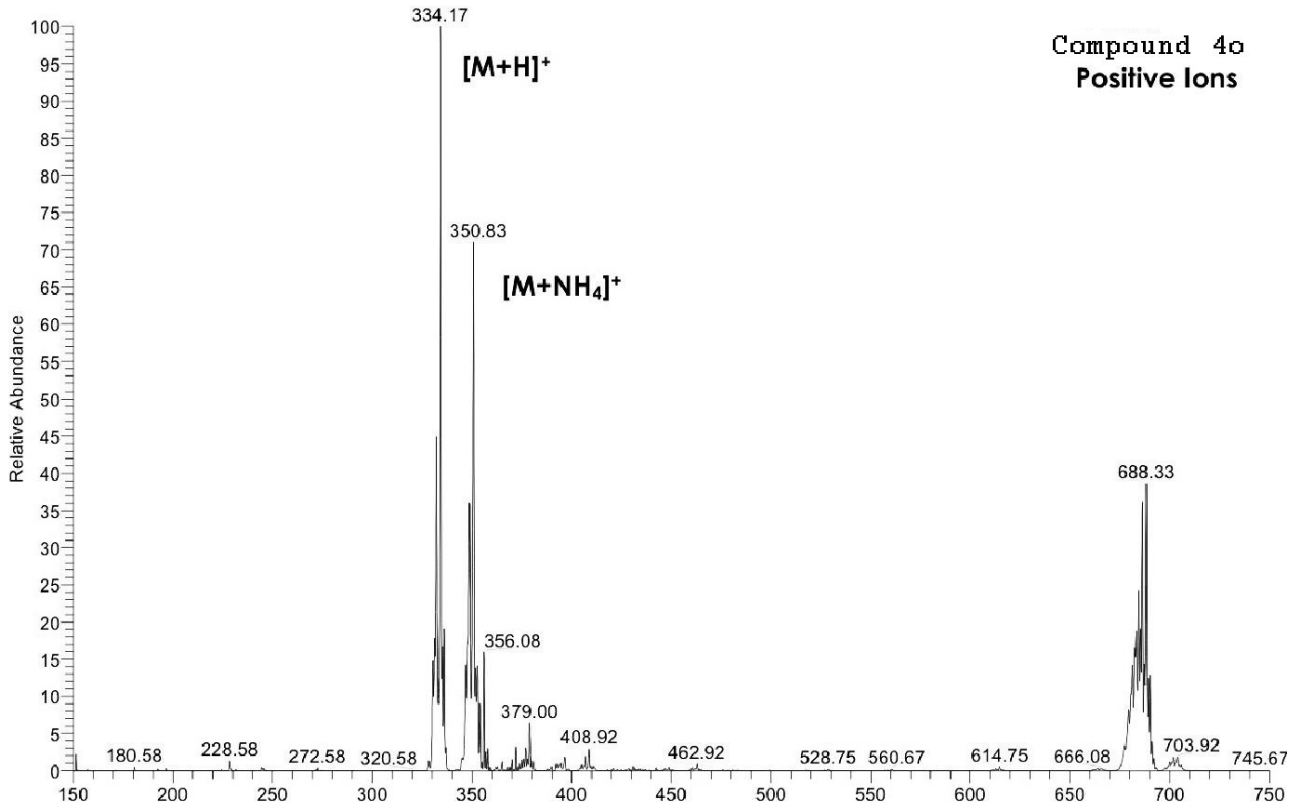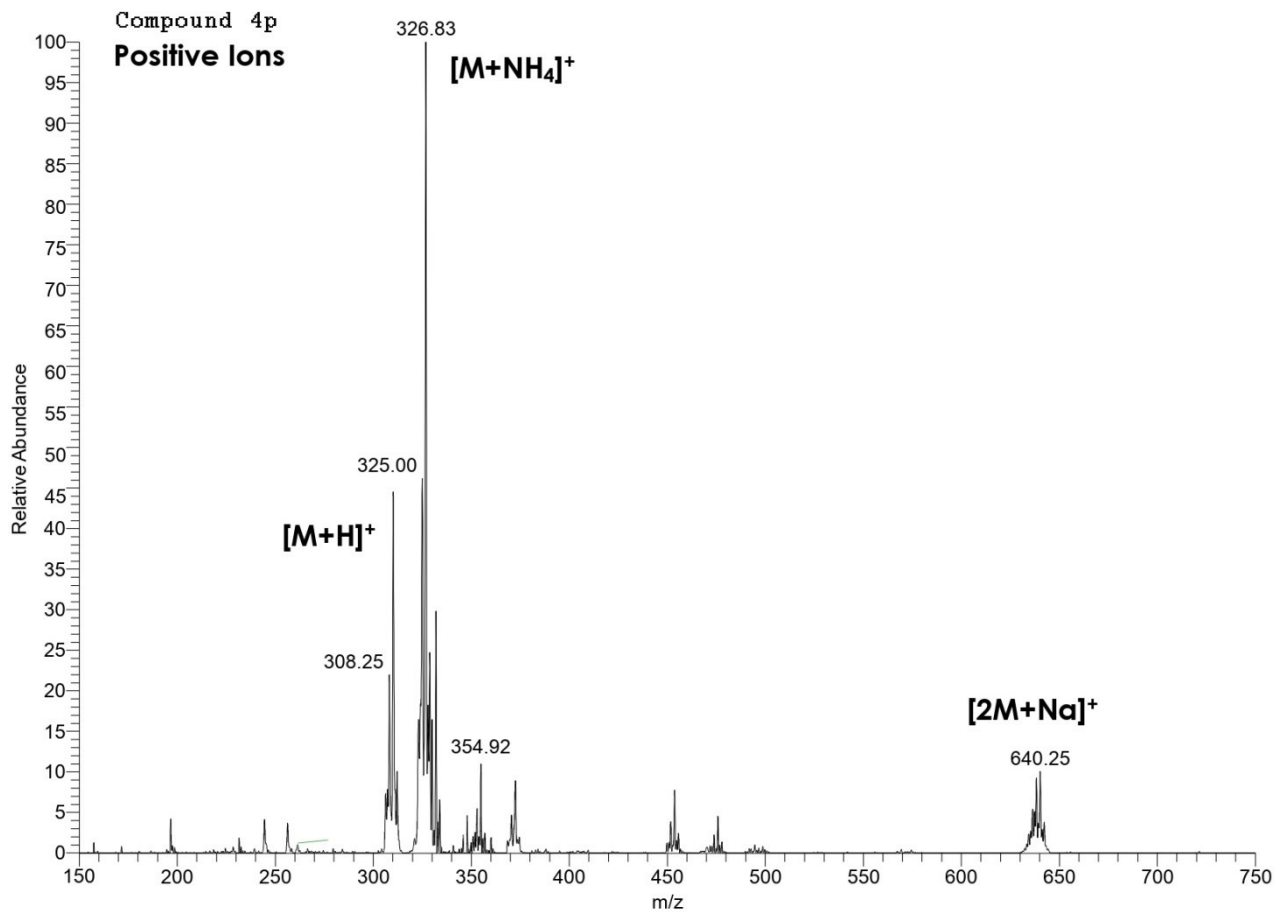

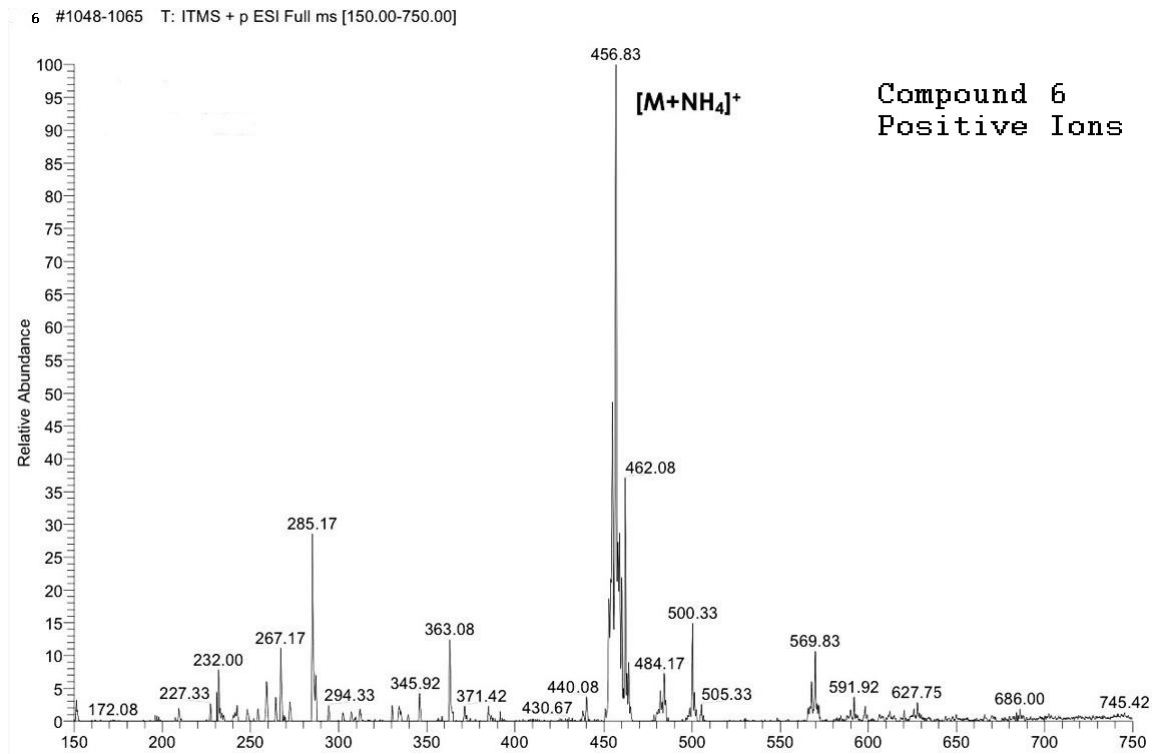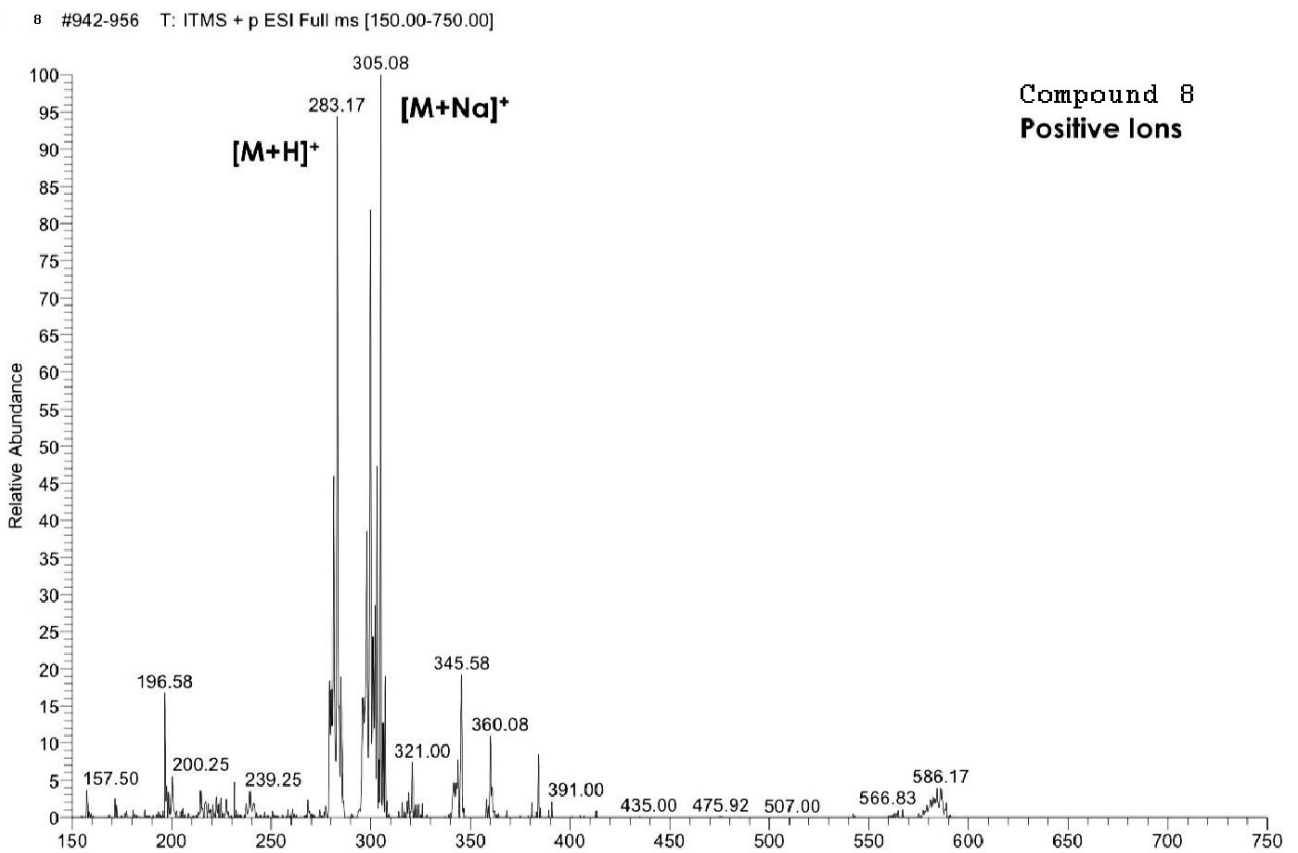

Current Chromatogram(s)

DAD1 B, Sg=240,4 Ref=400,40 (E:\DATA\2023\03 MARZO\27-03-2023 2023-03-27 09-21-19\VAL7.D)

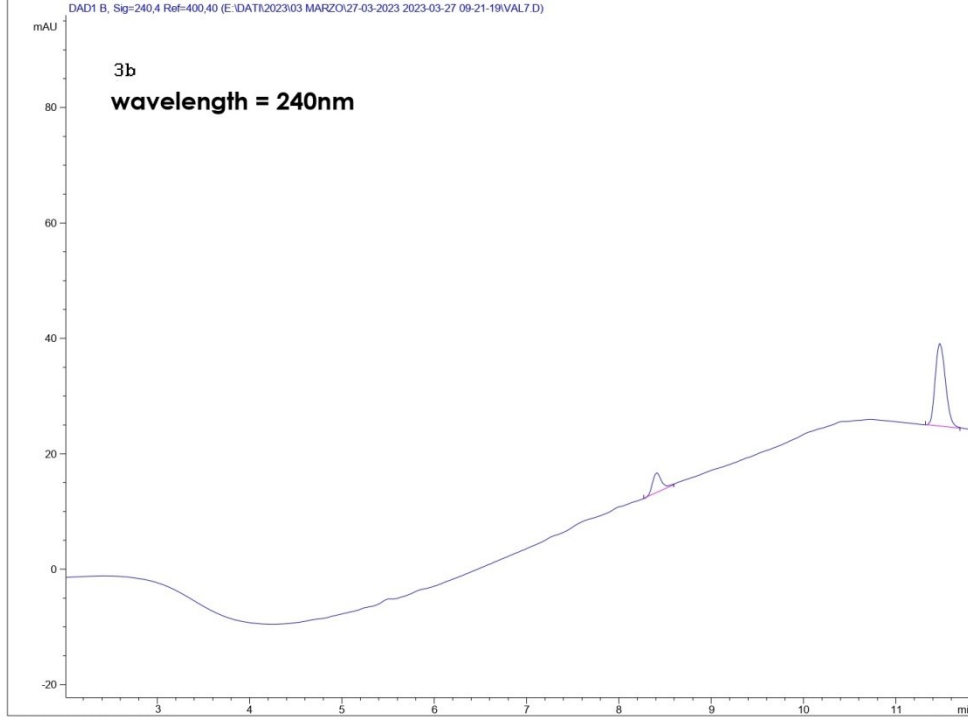

Current Chromatogram(s)

DAD1 B, Sg=240,4 Ref=400,40 (E:\DATA\2023\03 MARZO\24-03-2023 2023-03-24 09-50-33\VAL14.D)

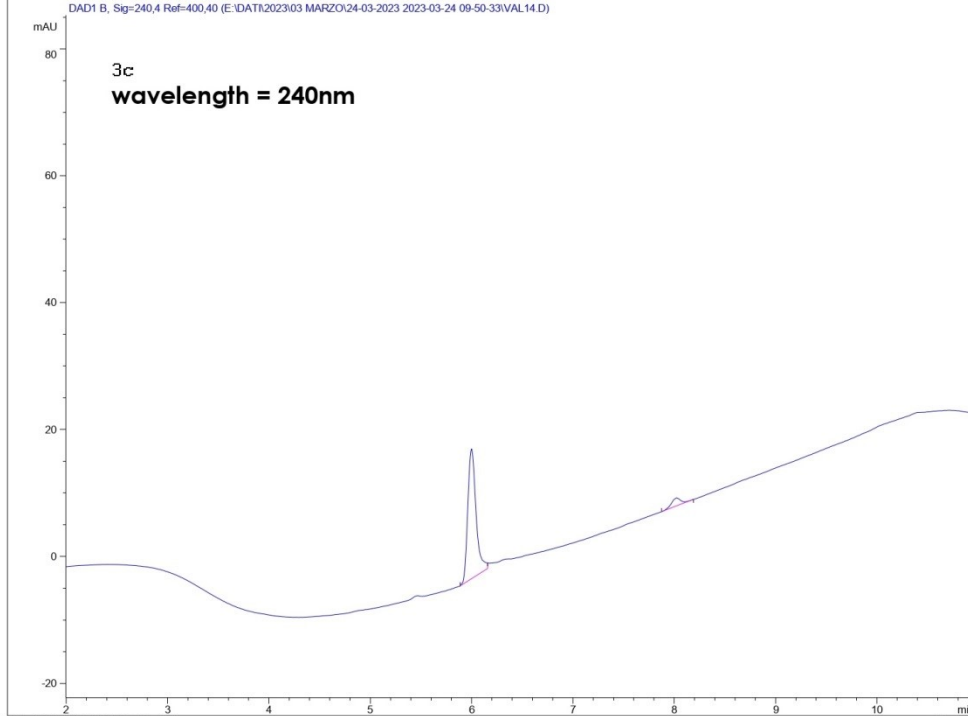

Current Chromatogram(s)

DAD1 B, Sig=240,4 Ref=400,40 (E:\DATA\2023\03 MARZO\24-03-2023 2023-03-24 09-50-33\VAL9.D)

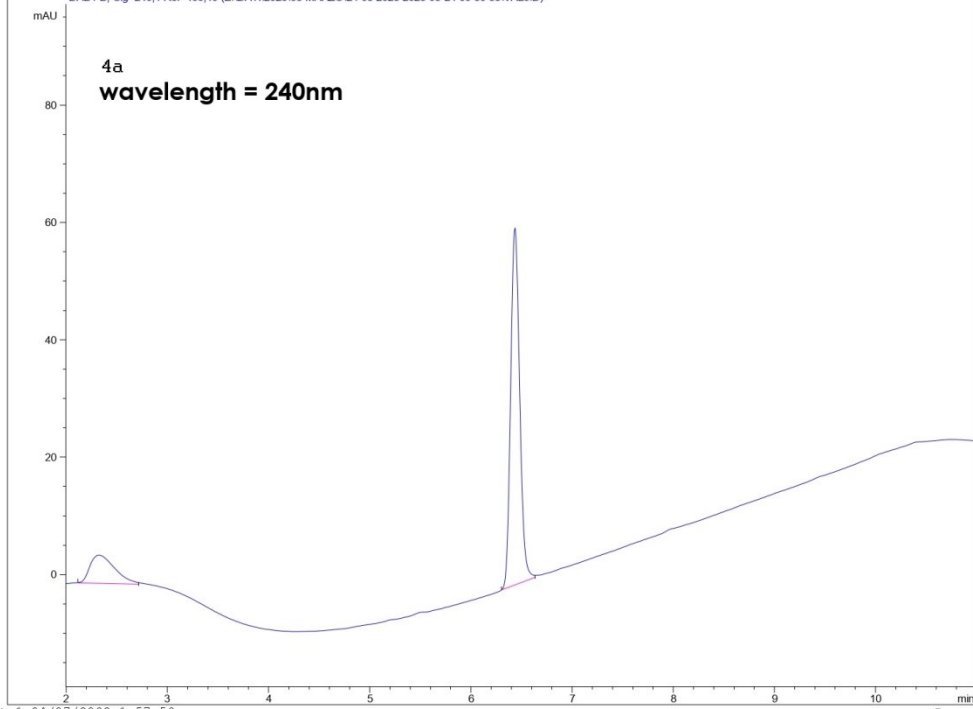

Instrument 1 04/07/2002 1.57.50

Page 1 of 1

DAD1 B, Sig=240,4 Ref=400,40 (E:\DATA\2023\03 MARZO\23-03-2023 2023-03-23 11-44-24\CAT4.D)

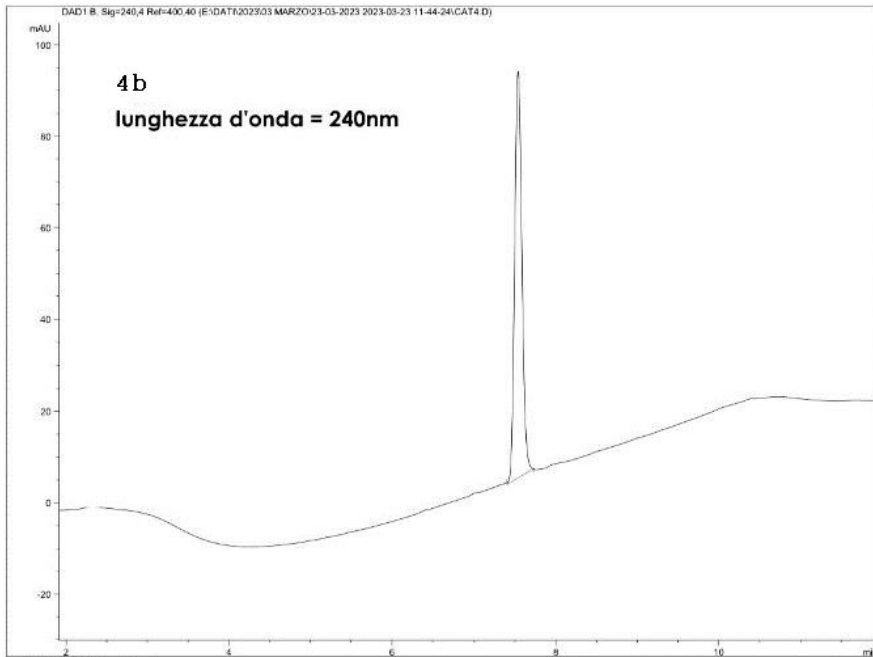

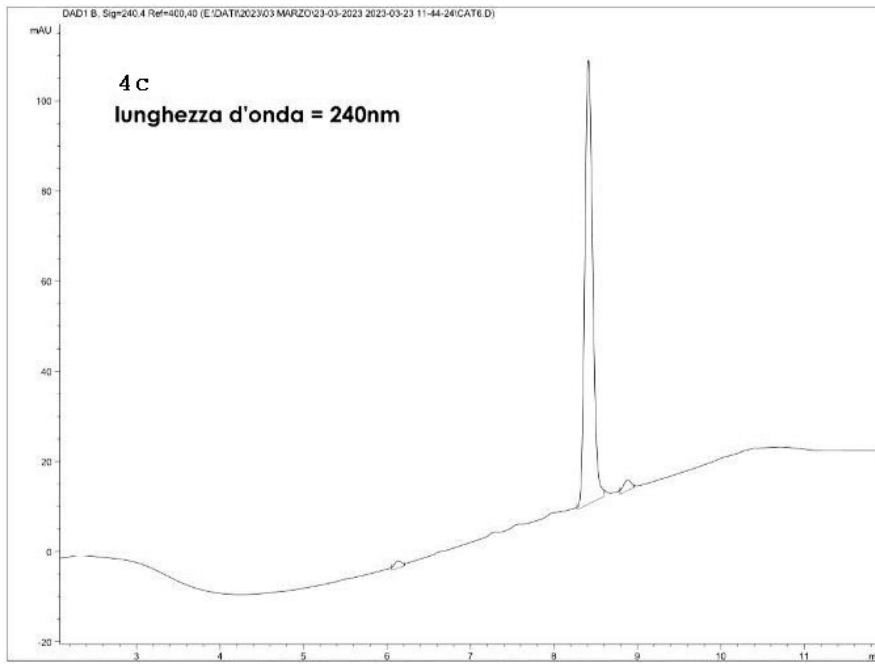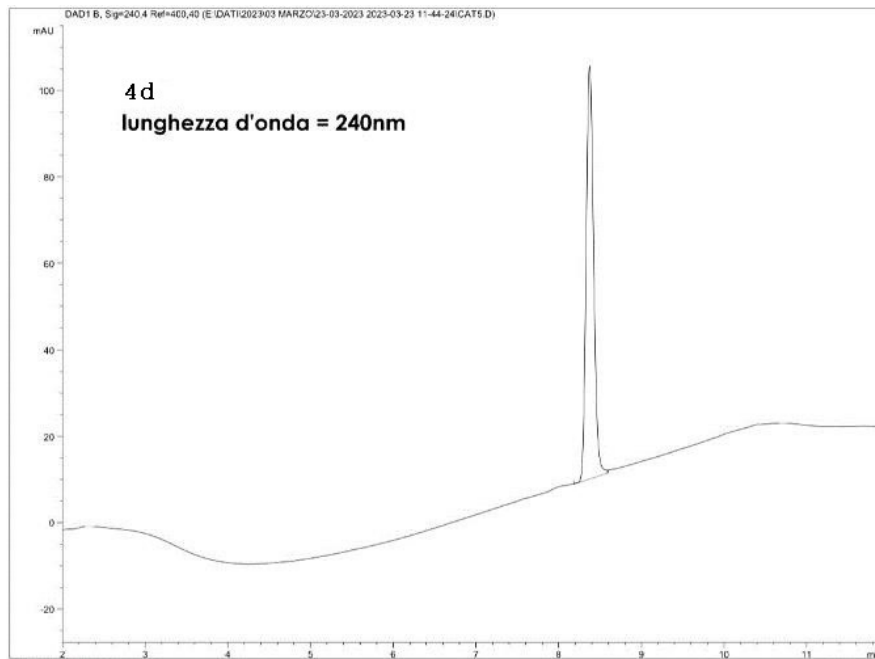

Current Chromatogram(s)

DAD1 B, Sig=240,4 Ref=400,40 (E:\DATA\2023\03 MARZO\24-03-2023 2023-03-24 09:50:33\VAL8.D)

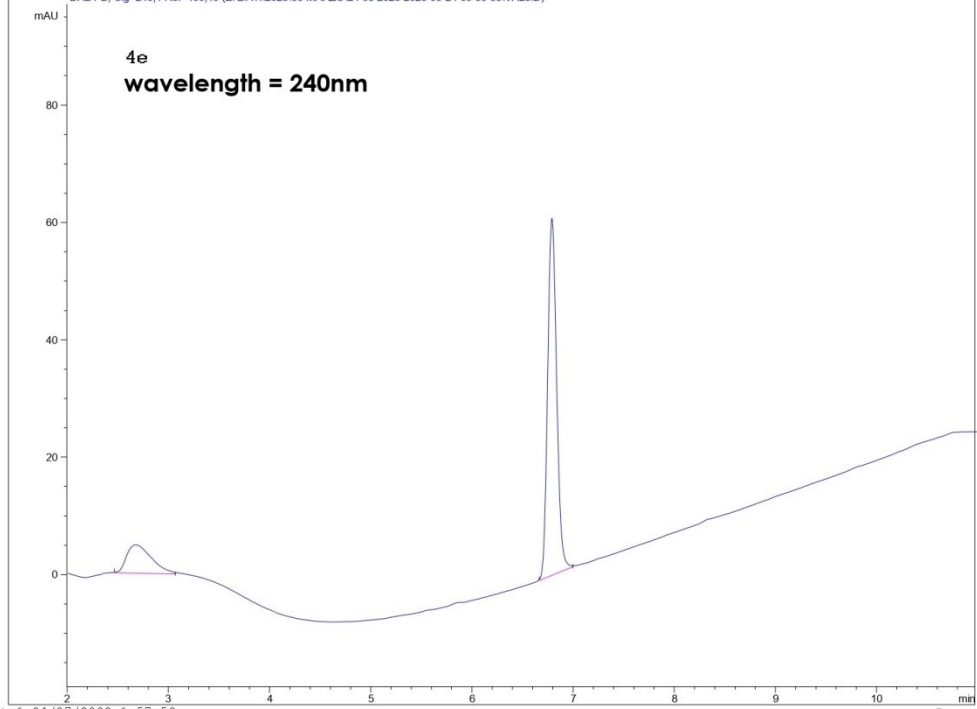

Instrument 1 04/07/2002 1.57.50

Page 1 of 1

DAD1 B, Sig=240,4 Ref=400,40 (E:\DATA\2023\03 MARZO\23-03-2023 2023-03-23 11:44:24\GAT8.D)

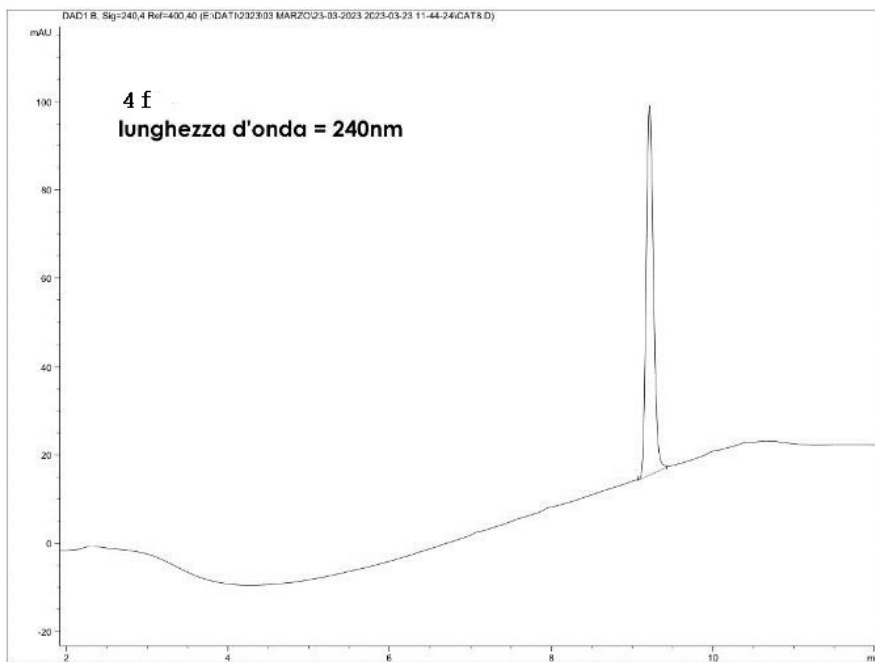

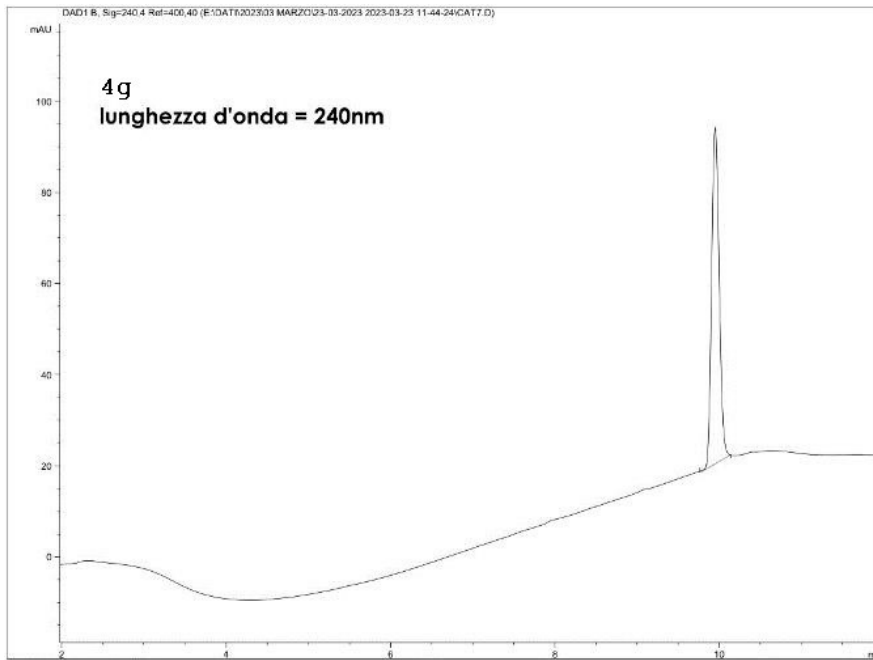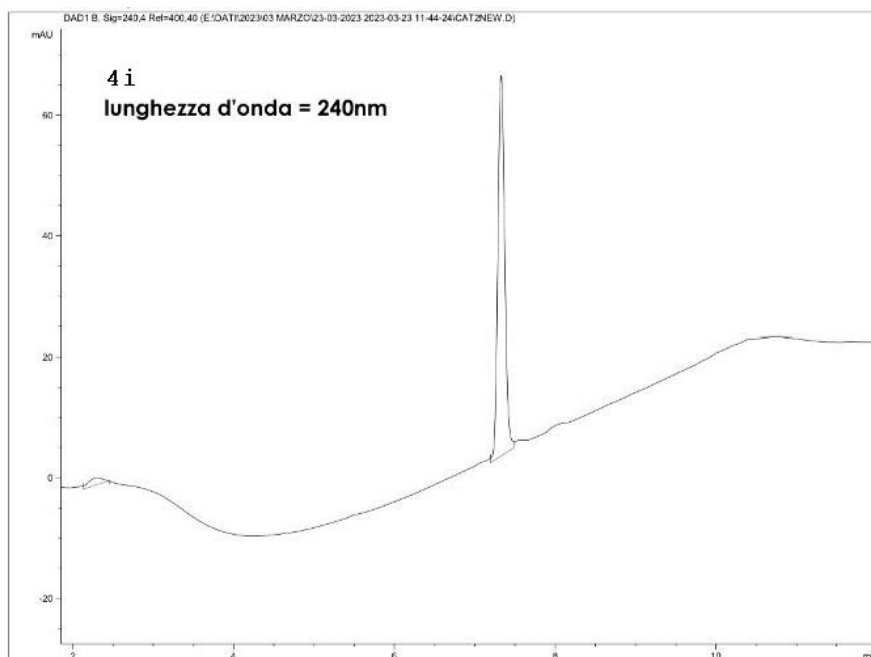



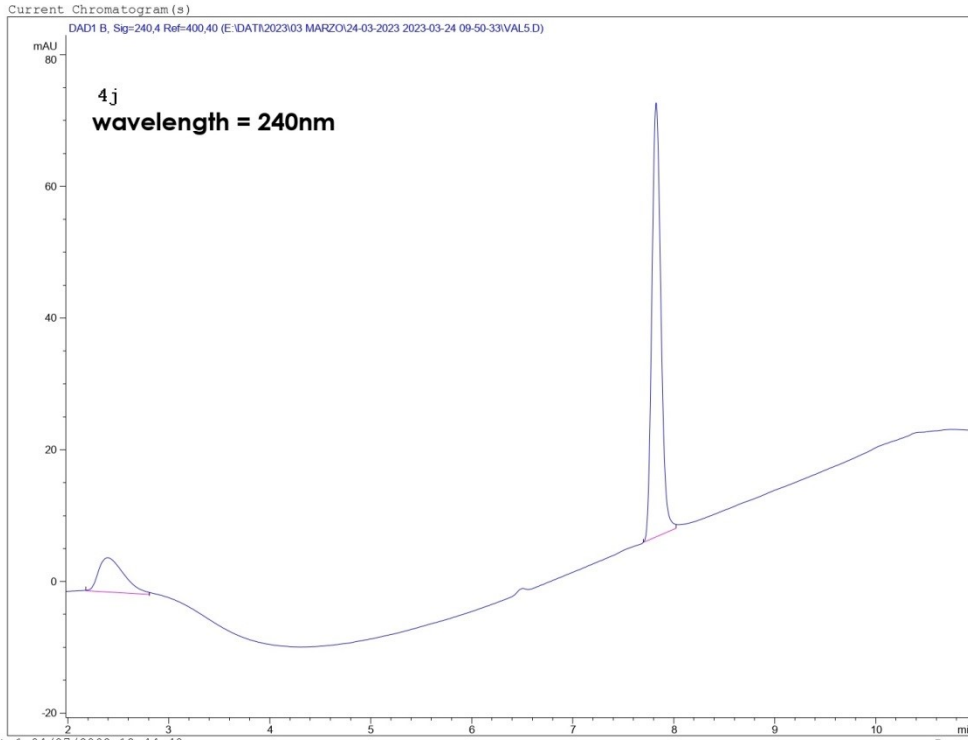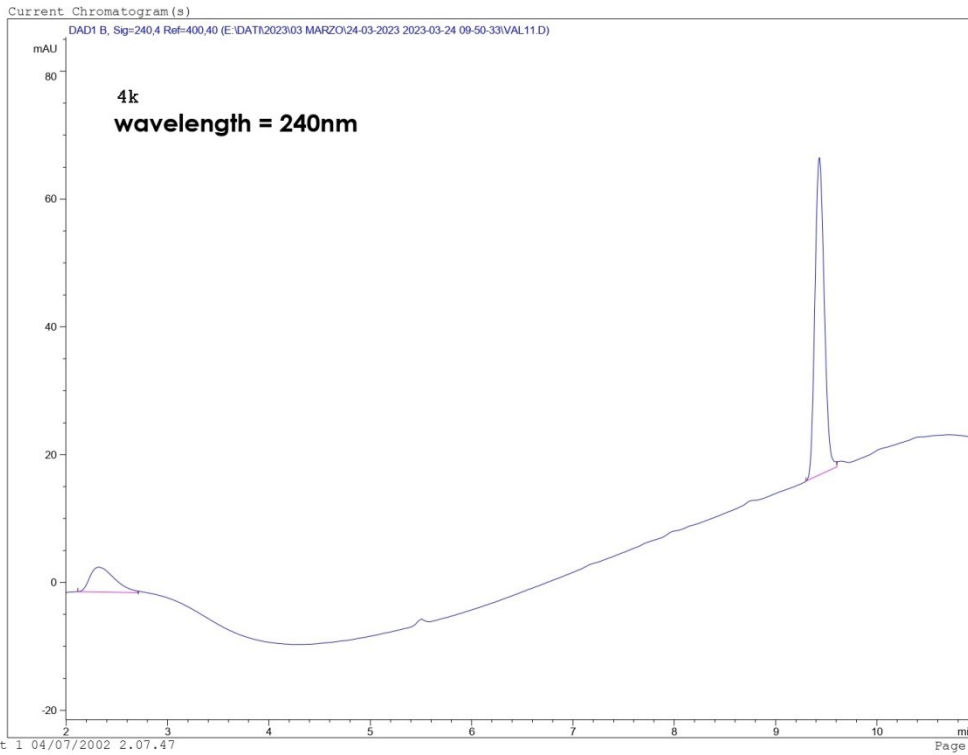

Current Chromatogram(s)

DAD1 B, Sg=240,4 Ref=400,40 (E:\DATA\2023\03 MARZO\24-03-2023 2023-03-24 09-50-33\VAL10.D)

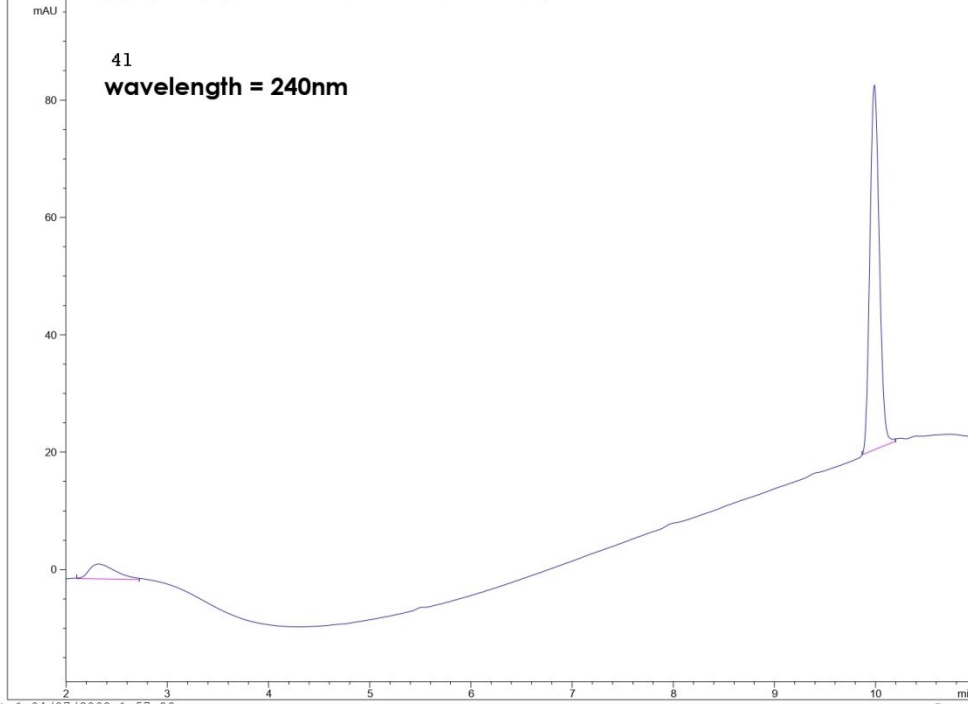

Current Chromatogram(s)

DAD1 B, Sg=240,4 Ref=400,40 (E:\DATA\2023\03 MARZO\24-03-2023 2023-03-24 09-50-33\VAL6.D)

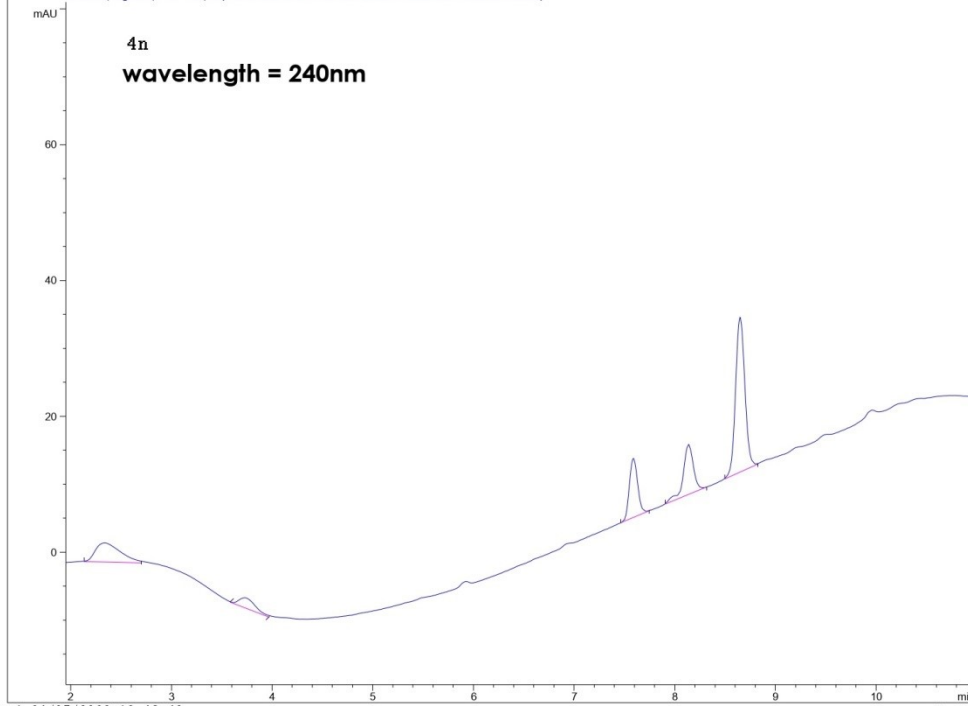

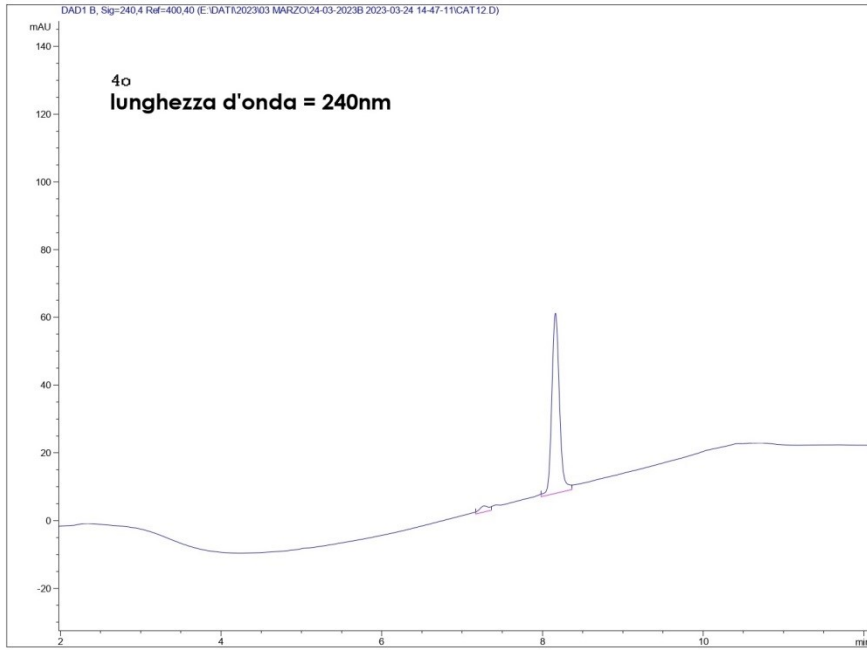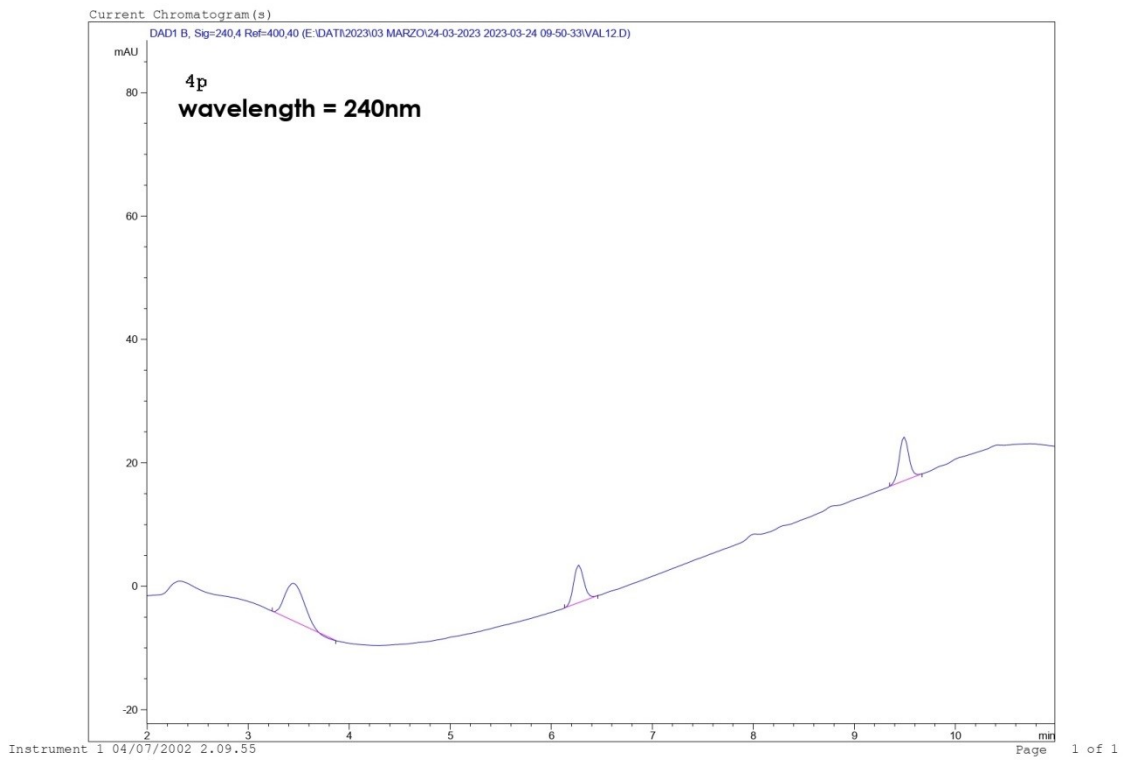

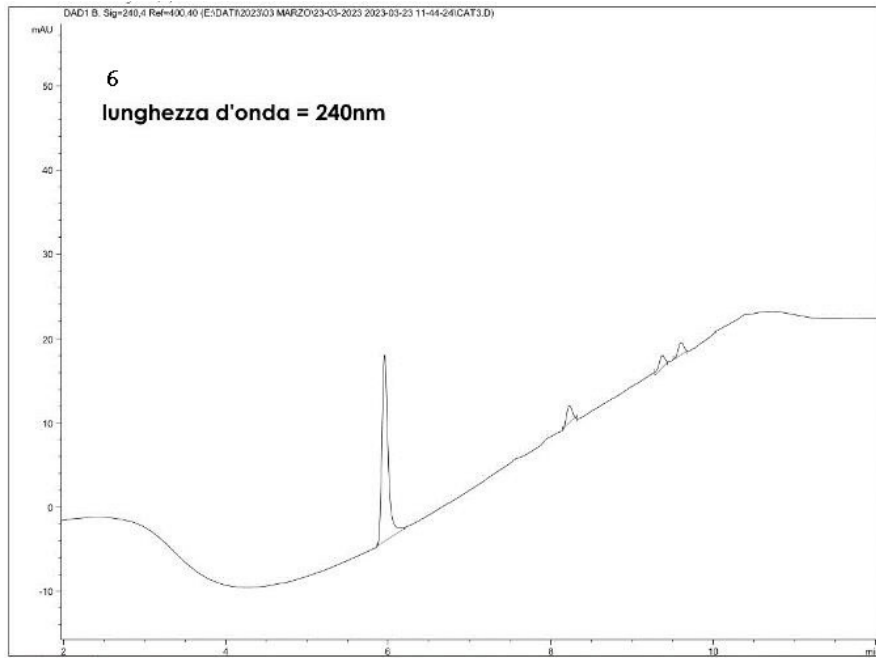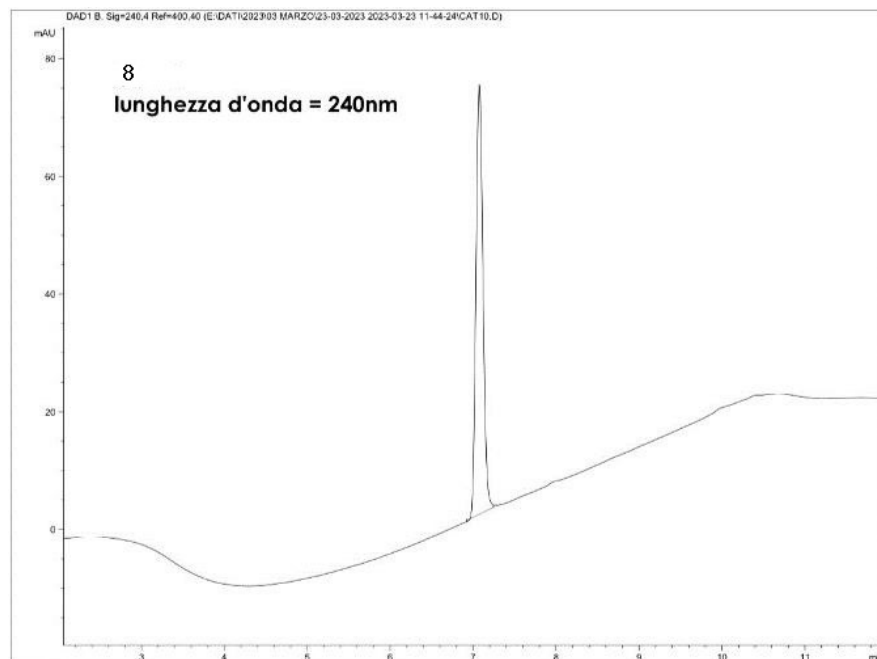

**Table S1.** Purity data (retention time RT, area, height, width)

| <b>Compound</b> | <b>RT (min)</b> | <b>Area</b> | <b>Height</b> | <b>Width 1/2 (min)</b> |
|-----------------|-----------------|-------------|---------------|------------------------|
| <b>4b</b>       | 7,535           | 547         | 89            | 0,103                  |
| <b>4c</b>       | 8,412           | 646         | 99            | 0,109                  |
| <b>4d</b>       | 8,374           | 602         | 96            | 0,105                  |
| <b>4f</b>       | 9,212           | 526         | 84            | 0,105                  |
| <b>4g</b>       | 9,948           | 471         | 74            | 0,106                  |
| <b>4i</b>       | 7,326           | 372         | 63            | 0,099                  |
| <b>4m</b>       | 7,120           | 97          | 15            | 0,109                  |
| <b>4o</b>       | 8,160           | 353         | 52            | 0,110                  |
| <b>6</b>        | 5,957           | 116         | 22            | 0,087                  |
| <b>8</b>        | 7,071           | 428         | 73            | 0,098                  |

3. Crystallographic data and refinement parameters of **4d**

**Table S2**

|                                   | <b>4d</b>                                          |
|-----------------------------------|----------------------------------------------------|
| empirical formula                 | C <sub>11</sub> H <sub>11</sub> NO <sub>2</sub> Se |
| formula weight                    | 268.17                                             |
| T (K)                             | 100                                                |
| Crystal system, space group       | orthorhombic, Pbca                                 |
| Unit cell dimensions (Å)          | a = 12.976(1)<br>b = 7.1286(6)<br>c = 22.931(2)    |
| V (Å <sup>3</sup> )               | 2121.1(3)                                          |
| Z, dcalc(g/cm <sup>3</sup> )      | 8, 1.680                                           |
| μ (mm <sup>-1</sup> )             | 4.631                                              |
| F(000)                            | 1072                                               |
| Reflections collected/unique/Rint | 16898 / 1920 / 0.0466                              |
| Data/parameters                   | 1914 / 169                                         |
| Final R indices [I>2σ(I)]         | R1 = 0.0451, wR2 = 0.1271                          |
| R indices all data                | R1 = 0.0461, wR2 = 0.1274                          |

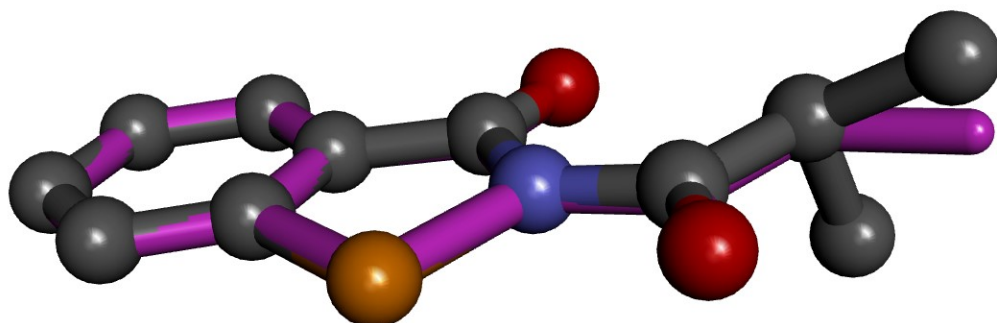

**Figure S1.** Superimposition of the **4d** (ball and stick) and the XAYHIO (stick, purple) molecules.

4. Volume and surface accessible to solvent for **4d**, **4e**, **4j**, **4g** and **4k** and for the *i*-propyl, *t*-butyl, *c*-propyl, *n*-pentyl and *c*-pentyl residues

For molecules **4d**, **4e**, **4j**, **4g** and **4k**, the surface accessible to solvent (Connolly surface, Å<sup>2</sup>) and the subtended volume (Å<sup>3</sup>) were evaluated (by Accelrys\DSViewerPro60) and reported in **Table S3**.

The same values are evaluated also for the *i*-propyl, *t*-butyl, *c*-propyl, *n*-pentyl and *c*-pentyl residues.

**Table S3**

| <b>Compound</b>         | Volume Å <sup>3</sup> | Surface area Å <sup>2</sup> |
|-------------------------|-----------------------|-----------------------------|
| <b>4d</b>               | 169.96                | 196.66                      |
| <b>4e</b>               | 189.41                | 206.88                      |
| <b>4j</b>               | 161.08                | 187.38                      |
| <b>4g</b>               | 201.88                | 236.45                      |
| <b>4k</b>               | 191.92                | 218.73                      |
|                         |                       |                             |
| <b>residue</b>          |                       |                             |
| <b><i>i</i>-propyle</b> | 74.57                 | 95.55                       |
| <b><i>t</i>-butyl</b>   | 91.66                 | 110.31                      |
| <b><i>c</i>-propyl</b>  | 64.77                 | 87.77                       |
| <b><i>n</i>-pentyl</b>  | 107.42                | 133.62                      |
| <b><i>c</i>-pentyl</b>  | 90.53                 | 111.71                      |



5. *Overlapping of surface accessible to solvent of compounds 4d, 4e, 4j*

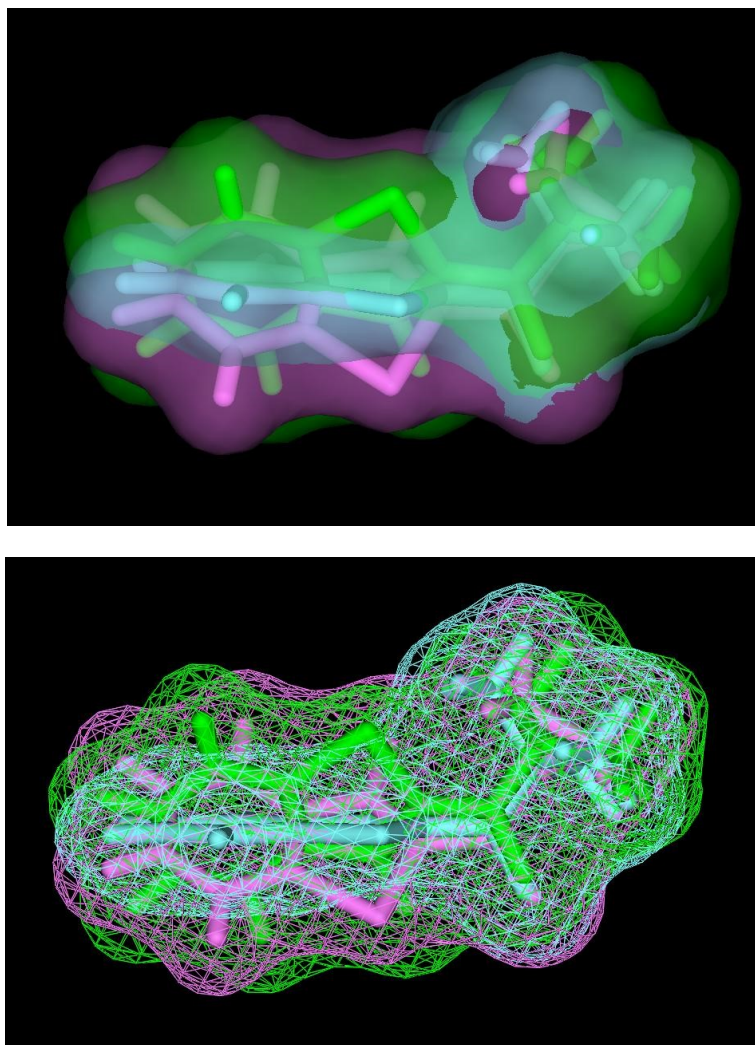

**Figure S2.** The surface accessible to solvent (Connolly surface) of **4d** (green), **4e** (light blue), **4j** (pink).

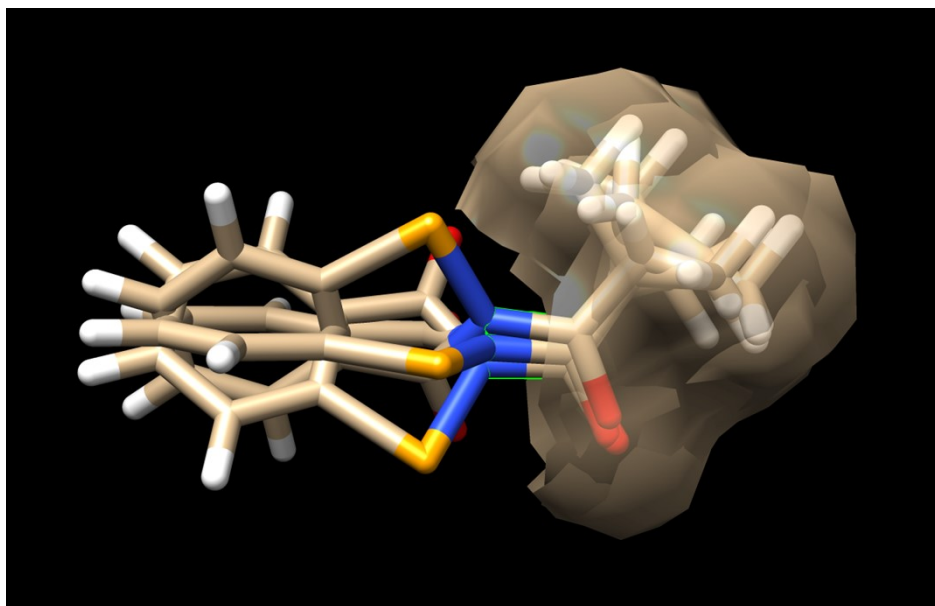

**Figure S3.** Surface accessible to solvent for the residues *i*-propyl, *t*-butyl and *c*-propyl.

Compounds **4g** and **4k**, respectively, the *n*-pentanyl and the cyclopentanyl derivatives show a similar surface accessible to solvent as illustrated in **Figure S4**.

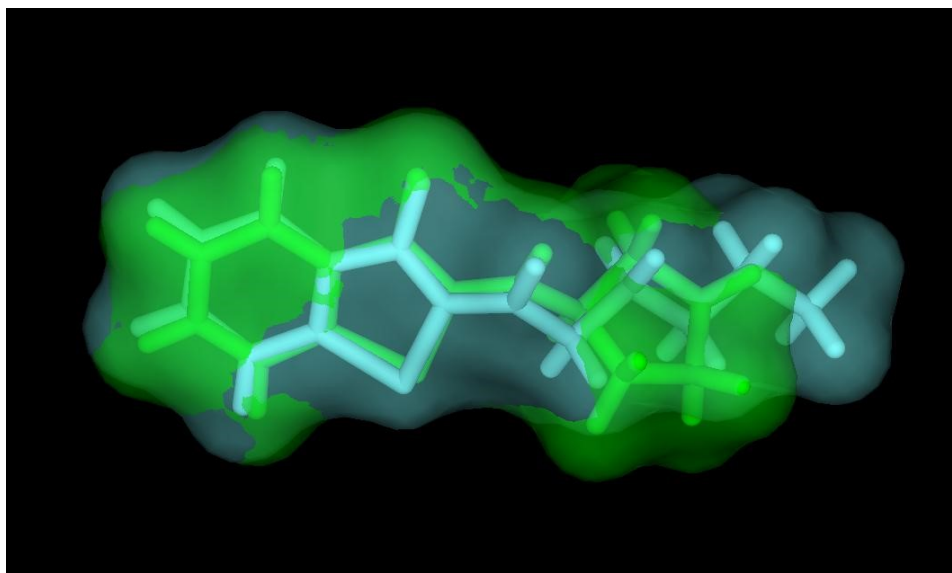

**Figure S4.** The surface accessible to solvent (Connolly surface) of **4g** (light blue) and **4k** (green).

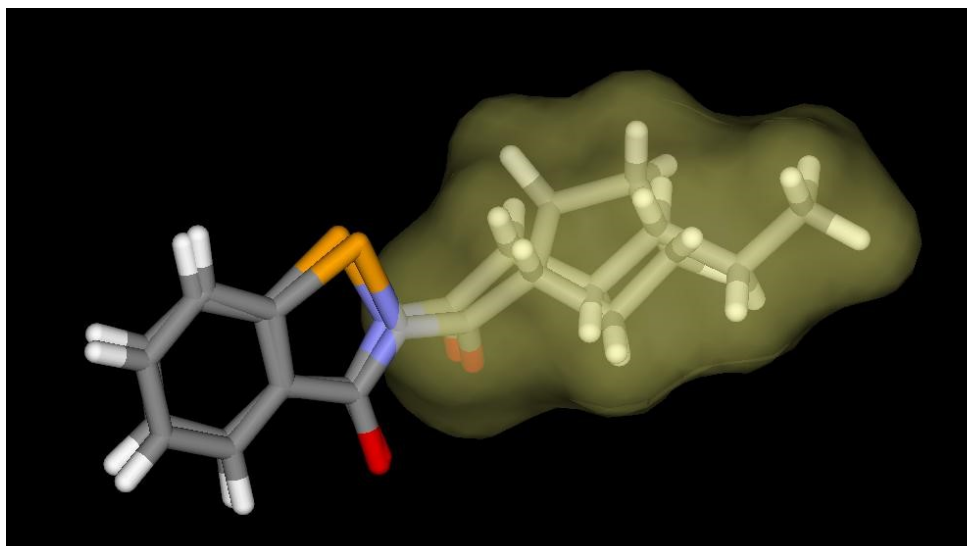

**Figure S5.** Surface accessible to solvent for the residues *n*-pentyl and *c*-pentyl.
